# Supplementary material for: CDC7 kinase promotes MRE11 fork processing, modulating fork speed and chromosomal breakage
Source: PubMed Central journal article supplement — EMBO Rep. 2020 Jun 4;21(8):e48920. doi: 10.15252/embr.201948920 (PMC7403700; doi:10.15252/embr.201948920), 2020-06-04

## Figure 1B source data

Comet assay tail moment\_U2OS cells

|    | Untreated | XL413    | HU       | XL413 + HU |
|----|-----------|----------|----------|------------|
| 1  | 0.966201  | 0        | 0.802006 | 1.947075   |
| 2  | 3.224916  | 1.69447  | 8.478817 | 0.287588   |
| 3  | 1.272945  | 0.04812  | 0.172545 | 2.192302   |
| 4  | 2.186317  | 0.782956 | 1.985683 | 0          |
| 5  | 1.161633  | 3.47681  | 1.216049 | 0.848876   |
| 6  | 1.394004  | 1.554656 | 13.78175 | 0.901136   |
| 7  | 1.247653  | 1.79761  | 3.2744   | 0.017198   |
| 8  | 1.0997    | 0.746245 | 0.698397 | 0          |
| 9  | 1.008595  | 5.674556 | 8.272383 | 0.107384   |
| 10 | 3.348142  | 1.509997 | 0.552471 | 0          |
| 11 | 6.688636  | 0.249283 | 2.409308 | 0.240454   |
| 12 | 1.804285  | 2.207614 | 3.539439 | 1.89897    |
| 13 | 1.454032  | 0.788064 | 2.676426 | 0.026137   |
| 14 | 0.388726  | 1.039283 | 1.723498 | 0.343525   |
| 15 | 0.899736  | 3.784942 | 10.41089 | 0.489255   |
| 16 | 1.13029   | 7.423656 | 2.95524  | 0          |
| 17 | 13.66386  | 1.774198 | 0.185609 | 2.81442    |
| 18 | 0.56526   | 1.387659 | 2.198251 | 4.065642   |
| 19 | 3.587869  | 2.091955 | 5.542328 | 0.351145   |
| 20 | 0.253001  | 2.044363 | 1.350074 | 5.462767   |
| 21 | 1.705256  | 0.425317 | 0.038705 | 0          |
| 22 | 1.401657  | 0.927257 | 0.53981  | 1.012438   |
| 23 | 1.069763  | 21.06215 | 1.035059 | 2.00375    |
| 24 | 2.660051  | 33.1098  | 3.954858 | 1.558363   |
| 25 | 0.064261  | 0.002899 | 30.06507 | 1.733453   |
| 26 | 0         | 4.135634 | 1.181016 | 2.325324   |
| 27 | 2.612595  | 0.568575 | 0        | 1.089986   |
| 28 | 3.424767  | 1.926964 | 0        | 0          |
| 29 | 1.809749  | 3.156648 | 0        | 0.06887    |
| 30 | 1.458056  | 3.138832 | 2.76879  | 3.267815   |
| 31 | 3.346931  | 0.756133 | 20.04839 | 1.149238   |
| 32 | 1.430636  | 3.739738 | 2.351318 | 1.340193   |
| 33 | 3.315915  | 8.950206 | 2.301536 | 2.264191   |
| 34 | 0.07127   | 19.24938 | 5.414336 | 4.86845    |
| 35 | 13.55018  | 3.336872 | 0        | 0.344478   |
| 36 | 0.854422  | 3.067315 | 0.658134 | 0.990406   |
| 37 | 1.570511  | 0.750075 | 2.174798 | 0.075187   |
| 38 | 1.757342  | 3.208416 | 21.7427  | 0          |
| 39 | 0.327735  | 3.686347 | 7.333244 | 0.213784   |
| 40 | 0.693725  | 2.078264 | 0.000063 | 0.192945   |
| 41 | 1.585012  | 2.382331 | 4.516827 | 0.537981   |

|    |          |          |          |          |
|----|----------|----------|----------|----------|
| 42 | 1.653442 | 0        | 3.912524 | 1.240372 |
| 43 | 0.42895  | 0        | 7.870388 | 2.031377 |
| 44 | 2.4708   | 0.966055 | 15.44772 | 0        |
| 45 | 1.267494 | 0.569361 | 0.679241 | 0.998658 |
| 46 | 2.147149 | 2.199466 | 1.579658 | 0.432114 |
| 47 | 1.672779 | 1.192116 | 35.66779 | 0.442886 |
| 48 | 0.064892 | 1.663897 | 0.272206 | 2.280821 |
| 49 | 1.564764 | 1.594086 | 0.723624 | 0.608195 |
| 50 | 2.032284 | 0.503734 | 0.53703  | 0        |
| 51 | 5.405722 | 1.394293 | 36.78441 | 0.02691  |
| 52 | 2.70974  | 0.468735 | 0.589203 | 8.517598 |
| 53 | 2.726872 | 0        | 4.182276 | 1.23266  |
| 54 | 3.22309  | 1.897516 | 12.91249 | 5.859618 |
| 55 | 2.818455 | 8.84526  | 1.904355 | 0.518443 |
| 56 | 1.09376  | 0.526386 | 0.000016 | 2.003467 |
| 57 | 0        | 2.089042 | 3.839048 | 1.021367 |
| 58 | 4.595801 | 0.339192 | 1.267432 | 0.496875 |
| 59 | 1.477356 | 9.107384 | 20.32072 | 0.93107  |
| 60 | 0.592312 | 7.03486  | 2.857461 | 0        |
| 61 | 1.755749 | 1.109303 | 0.158368 | 0.091438 |
| 62 | 1.595481 | 7.398687 | 1.045334 | 15.36075 |
| 63 | 0.007451 | 6.681062 | 5.615397 | 0.25209  |
| 64 | 1.038431 | 4.453417 | 25.32837 | 0.25209  |
| 65 | 0.393559 | 7.55712  | 0.164959 | 0.721313 |
| 66 | 0.975014 | 18.64312 | 4.475023 | 0        |
| 67 | 0.213226 | 0        | 0        | 1.363254 |
| 68 | 2.722275 | 1.402485 | 0.598968 | 1.240056 |
| 69 | 1.349036 | 1.03417  | 0        | 2.843892 |
| 70 | 0.581563 | 2.216467 | 4.76804  | 0.349134 |
| 71 | 2.678066 | 1.286316 | 4.319828 | 2.609312 |
| 72 | 0.555412 | 0.940663 | 9.597157 | 0        |
| 73 | 1.845947 | 3.513559 | 1.047457 | 2.101702 |
| 74 | 0.874512 | 1.364342 | 3.03658  | 0.231998 |
| 75 | 1.388178 | 0.175263 | 9.874778 | 0.488454 |
| 76 | 1.389924 | 0.377588 | 22.84136 | 0.071688 |
| 77 | 0.356489 | 0.346838 | 17.86697 | 0.090749 |
| 78 | 5.236015 | 2.32286  | 10.06748 | 0.118643 |
| 79 | 3.714393 | 1.804581 | 0.009097 | 2.870426 |
| 80 | 1.601855 | 0        | 0        | 0.39694  |
| 81 | 14.02612 | 1.473307 | 0.907123 | 0.396726 |
| 82 | 0.601145 | 0.54162  | 21.85489 | 0.884756 |
| 83 | 4.190459 | 0.524359 | 7.995608 | 2.289271 |
| 84 | 0.552341 | 1.042638 | 1.758057 | 0.414496 |
| 85 | 3.368379 | 1.980055 | 0.577582 | 0.551813 |
| 86 | 1.45892  | 2.751267 | 0.90613  | 0        |

|     |          |          |          |          |
|-----|----------|----------|----------|----------|
| 87  | 0.436976 | 1.665517 | 0.626951 | 0.352997 |
| 88  | 0.964935 | 2.389171 | 0.154716 | 1.78019  |
| 89  | 0.72901  | 3.617952 | 2.768037 | 0        |
| 90  | 0.652205 | 3.114732 | 1.783187 | 0.090302 |
| 91  | 0        | 1.514384 | 0.000008 | 5.097808 |
| 92  | 0        | 1.749073 | 1.482105 | 0.884808 |
| 93  | 0.64986  | 22.43496 | 4.320495 | 0.006962 |
| 94  | 0.059329 | 1.494292 | 1.30229  | 1.593927 |
| 95  | 2.349735 | 1.729655 | 0.205425 | 2.025306 |
| 96  | 2.614693 | 2.026371 | 0.290911 | 0.13087  |
| 97  | 5.309181 | 3.694337 | 0.371187 | 1.881398 |
| 98  | 2.878313 | 3.190853 | 2.748845 | 0        |
| 99  | 1.403744 | 2.46209  | 5.036844 | 3.115324 |
| 100 | 3.512661 | 0.246041 | 0        | 0.662906 |
| 101 | 7.162149 | 4.570518 | 12.51289 | 1.502105 |
| 102 | 0.254966 | 2.077438 | 0        | 1.387777 |
| 103 | 3.86626  | 2.428323 | 0.62454  | 0.474867 |
| 104 | 2.178807 | 1.828638 | 11.57891 | 0        |
| 105 | 0.768551 | 2.049011 | 0.925292 | 0.597058 |
| 106 | 4.480124 | 3.719926 | 2.478613 | 0.880221 |
| 107 | 0        | 2.363283 | 0.065266 | 0.154128 |
| 108 | 10.61433 | 0.417123 | 2.426426 | 0.955811 |
| 109 | 2.123615 | 1.908505 | 31.22734 | 0.082848 |
| 110 | 1.045613 | 3.439741 | 0        | 0.297575 |
| 111 | 8.97971  | 1.28938  | 9.345731 | 0.588329 |
| 112 | 0.562166 | 2.313963 | 0.051067 | 20.03246 |
| 113 | 19.16927 | 3.220393 | 7.052266 | 0        |
| 114 | 0.752366 | 0.799505 | 4.55351  | 2.660791 |
| 115 | 0        | 1.67816  | 38.93766 | 8.374782 |
| 116 | 3.328326 | 0        | 16.79873 | 0.264042 |
| 117 | 0.659255 | 0.680742 | 2.53861  | 1.177767 |
| 118 | 4.724474 | 0.000831 | 0        | 0        |
| 119 | 0        | 1.068367 | 8.039712 | 0        |
| 120 | 2.64319  | 5.889877 | 0.768119 | 0.758933 |
| 121 | 0.127766 | 2.260917 | 2.473588 | 0.203518 |
| 122 | 10.10127 | 0.734023 | 0.602188 | 0.462202 |
| 123 | 7.055136 | 1.599272 | 6.164806 | 3.873871 |
| 124 | 0.811998 | 2.562893 | 0        | 2.781802 |
| 125 | 0.698457 | 0.852058 | 17.10447 | 29.64411 |
| 126 | 3.327198 | 2.65107  | 0        | 1.041286 |
| 127 | 1.976589 | 1.722412 | 0.169753 | 0.157109 |
| 128 | 0.112265 | 1.428672 | 17.99892 | 1.405769 |
| 129 | 1.218279 | 3.606946 | 38.94295 | 0.943325 |
| 130 | 1.24024  | 1.348418 | 0        | 0.604336 |
| 131 | 0.066734 | 0.970369 | 15.18147 | 0.396814 |

|     |          |          |          |          |
|-----|----------|----------|----------|----------|
| 132 | 1.396175 | 0.655914 | 0.000002 | 0        |
| 133 | 2.304267 | 0.220879 | 6.764848 | 0.12619  |
| 134 | 0.024666 | 1.030968 | 1.772014 | 0        |
| 135 | 2.642143 | 0.961504 | 14.45832 | 0.378246 |
| 136 | 0        | 0.954279 | 2.291928 | 0.00119  |
| 137 | 9.19822  | 0.586588 | 0.091512 | 9.875469 |
| 138 | 5.178263 | 5.616373 | 124.4418 | 2.03165  |
| 139 | 1.056216 | 0.082475 | 1.603079 | 0.404832 |
| 140 | 2.012911 | 0.700271 | 0.305018 | 0        |
| 141 | 2.981127 | 1.825141 | 0.467681 | 0.220618 |
| 142 | 1.011404 | 5.754851 | 0.42882  | 0.529014 |
| 143 | 2.734677 | 0.046399 | 0.000072 | 0.000072 |
| 144 | 1.26837  | 1.731592 | 0.317777 | 5.788861 |
| 145 | 0.783745 | 0.254264 | 0.361236 | 0        |
| 146 | 1.787068 | 2.331481 | 4.694512 | 0.250358 |
| 147 | 2.349024 | 0.777439 | 6.270593 | 0.977537 |
| 148 | 2.244901 | 1.866132 | 4.484099 | 0        |
| 149 | 1.045308 | 1.818918 | 3.042764 | 0.257564 |
| 150 | 1.22509  | 1.59585  | 0        | 0.092132 |
| 151 | 4.370274 | 0.846649 | 5.280642 | 0.256823 |
| 152 | 2.263351 | 0.971357 | 2.810489 | 0        |
| 153 | 1.818882 | 1.47587  | 0.2421   | 0.280868 |
| 154 | 0.021924 | 1.037476 | 20.04915 | 0.184533 |
| 155 | 5.114039 | 0.555544 | 50.85767 | 0.078802 |
| 156 | 9.166088 | 0.231778 | 1.260761 | 1.6597   |
| 157 | 1.521905 | 1.52205  | 3.842386 | 3.146945 |
| 158 | 0        | 2.374114 | 0        | 0.006202 |
| 159 | 2.231289 | 1.297521 | 2.724387 | 0.246385 |
| 160 | 1.830322 | 0.540659 | 10.90285 | 0.545911 |
| 161 | 6.453668 | 5.413424 | 31.70561 | 0.952425 |
| 162 | 1.187207 | 2.892692 | 28.91849 | 0.557879 |
| 163 | 1.014156 | 0.649579 | 0        | 0.55923  |
| 164 | 1.902651 | 2.96878  | 0.629019 | 0.263547 |
| 165 | 0.193856 | 0.948193 | 3.173769 | 0        |
| 166 | 2.048231 | 2.038522 | 0.87374  | 0        |
| 167 | 19.4933  | 0.34279  | 0        | 0.650547 |
| 168 | 2.57785  | 0.053795 | 10.96724 | 16.7937  |
| 169 | 3.491599 | 1.339293 | 0.000047 | 2.531945 |
| 170 | 0.252774 | 2.037179 | 3.229534 | 0.308814 |
| 171 | 0.88476  | 1.859263 | 0.925299 | 0.327982 |
| 172 | 1.221395 | 1.689069 | 3.387711 | 0.626905 |
| 173 | 1.661932 | 0.813278 | 16.89245 | 3.165415 |
| 174 | 22.93633 | 2.065864 | 0.221858 | 0.461425 |
| 175 | 1.860449 | 2.381785 | 5.008911 | 4.018899 |
| 176 | 1.987313 | 3.03357  | 0        | 0.000354 |

|     |          |          |          |          |
|-----|----------|----------|----------|----------|
| 177 | 0.503438 | 2.247887 | 1.403275 | 0        |
| 178 | 2.016219 | 0.96779  | 11.28012 | 0        |
| 179 | 0.942831 | 6.795275 | 3.446451 | 1.391681 |
| 180 | 1.722999 | 0.074777 | 10.06071 | 0        |
| 181 | 0.966158 | 2.991383 | 0.000325 | 0.348915 |
| 182 | 2.454031 | 3.299019 | 0.153562 | 1.465951 |
| 183 | 5.227227 | 2.150066 | 26.81343 | 0.922268 |
| 184 | 1.367092 | 0        | 13.06662 | 0.277013 |
| 185 | 0.151591 | 1.622926 | 6.641535 | 0        |
| 186 | 0.397041 | 0.354935 | 0.184114 | 0        |
| 187 | 4.179132 | 0.725134 | 0        | 4.275242 |
| 188 | 1.270805 | 0.897429 | 0.473913 | 2.586963 |
| 189 | 1.674058 | 3.579655 | 15.30705 | 0.29911  |
| 190 | 2.145367 | 2.938259 | 0        | 0        |
| 191 | 1.0518   | 2.751686 | 9.179023 | 0        |
| 192 | 2.273943 | 1.329499 | 10.7079  | 0.002252 |
| 193 | 0.094358 | 2.334443 | 0        | 0.000028 |
| 194 | 1.175065 | 1.915209 | 23.33231 | 0        |
| 195 | 3.412372 | 3.287381 | 23.73564 | 2.321047 |
| 196 | 1.853431 | 0        | 4.964848 | 0.375833 |
| 197 | 2.227234 | 0        | 1.37207  | 0.008259 |
| 198 | 4.574844 | 1.905208 | 2.843917 | 0        |
| 199 | 1.257552 | 2.455227 | 0.000198 | 0        |
| 200 | 0.967055 | 0.694503 | 12.69691 | 0.013036 |
| 201 | 0        | 1.776948 | 7.044811 | 0.035401 |
| 202 | 1.06563  | 1.061245 | 0.000279 | 8.633513 |
| 203 | 0.080183 | 3.842186 | 2.042322 | 0.001643 |
| 204 | 3.705985 | 0        | 0.016926 | 1.090758 |
| 205 | 2.24144  | 0.514214 | 30.83212 | 0        |
| 206 | 0        | 0.695848 | 0.062958 | 0        |
| 207 | 3.248479 | 1.456912 | 0.07248  | 0.009089 |
| 208 | 9.204206 | 1.156669 | 0.098585 | 2.768162 |
| 209 | 1.171852 | 3.105099 | 1.630738 | 5.005034 |
| 210 | 1.490033 | 0.337964 | 0.313063 | 0        |
| 211 | 13.23851 | 0.252876 | 2.768201 | 1.417035 |
| 212 | 16.59975 | 2.120631 | 0        | 0.583408 |
| 213 | 0        | 1.563282 | 0.779505 | 2.465831 |
| 214 | 2.874682 | 0.479015 | 0        | 0.363048 |
| 215 | 0.498399 | 4.617072 | 6.950522 | 1.069597 |
| 216 | 2.153677 | 1.746562 | 4.781383 | 0.147549 |
| 217 | 0.35595  | 0.144788 | 18.09161 | 0.276872 |
| 218 | 6.652737 | 1.751886 | 1.855352 | 0.511059 |
| 219 | 38.21971 | 5.024683 | 4.674158 | 0.503532 |
| 220 | 0.962131 | 0.411552 | 3.806878 | 1.338412 |
| 221 | 0.403493 | 1.511656 | 0.995087 | 0        |

|     |          |          |          |          |
|-----|----------|----------|----------|----------|
| 222 | 1.908457 | 0.519762 | 0        | 0        |
| 223 | 1.154213 | 7.988925 | 8.309609 | 0        |
| 224 | 0.609126 | 6.410876 | 3.208052 | 2.127244 |
| 225 | 1.594757 | 0.041333 | 2.868099 | 0        |
| 226 | 13.90687 | 0.315706 | 3.525891 | 5.917911 |
| 227 | 0.19254  | 2.649066 | 0        | 1.744835 |
| 228 | 0.756902 | 2.392338 | 22.52686 | 0.867716 |
| 229 | 0.861959 | 1.947729 | 6.184835 | 0.14304  |
| 230 | 2.210503 | 2.444317 | 1.369659 | 3.333788 |
| 231 | 1.615795 | 0        | 2.548346 | 0.961683 |
| 232 | 0        | 1.354487 | 0.092677 | 0.556062 |
| 233 | 0.410408 | 1.15268  | 0        | 2.207961 |
| 234 | 1.642734 | 0.543782 | 0.191917 | 0.306835 |
| 235 | 2.576299 | 1.005428 | 0        | 0.942811 |
| 236 | 0.57231  | 2.511187 | 6.870595 | 0.13546  |
| 237 | 3.191527 | 1.386106 | 2.679861 | 0.826894 |
| 238 | 13.64025 | 1.009246 | 0.154777 | 0.064073 |
| 239 | 2.094677 | 2.139532 | 0.862911 | 0        |
| 240 | 0.920524 | 0.784577 | 0        | 0.644345 |
| 241 | 1.259989 | 1.217464 | 0.181789 | 0.214314 |
| 242 | 1.72615  | 0.676181 | 0        | 0.866439 |
| 243 | 2.305162 | 0.280227 | 0        | 8.688371 |
| 244 | 0.507908 | 6.957728 | 0.149696 | 0        |
| 245 | 2.018313 | 4.33394  | 0.59936  | 1.968866 |
| 246 | 2.081231 | 2.16317  | 10.89578 | 1.053514 |
| 247 | 3.191948 | 2.328834 | 6.284709 | 0.838741 |
| 248 | 0.548547 | 0.018083 | 2.312788 | 0.809117 |
| 249 | 1.988536 | 0.004967 | 0.000061 | 0.167569 |
| 250 | 0.434281 | 1.085923 | 1.136566 | 0.186867 |
| 251 | 9.812121 | 0.481763 | 3.098034 | 0.360003 |
| 252 | 0.280759 | 2.586789 | 2.396487 | 0        |
| 253 | 1.165564 | 1.074763 | 0.551367 | 1.013067 |
| 254 | 0.159085 | 1.283835 | 3.015499 | 0.039046 |
| 255 | 1.911954 | 2.734639 | 0.000136 | 0.169469 |
| 256 | 7.732241 | 1.416388 | 0        | 2.333639 |
| 257 | 2.2809   | 2.5939   | 14.44681 | 0.532145 |
| 258 | 0.107303 | 0        | 5.993723 | 0.047428 |
| 259 | 0.291282 | 5.024481 | 1.796766 | 4.491295 |
| 260 | 1.222773 | 5.838329 | 9.11079  | 0.558066 |
| 261 | 3.024667 | 3.384106 | 3.409724 | 4.499353 |
| 262 | 2.274633 | 0.794498 | 46.50893 | 0        |
| 263 | 9.359238 | 0        | 10.84015 | 0        |
| 264 | 0.016464 | 2.89757  | 0.231141 | 0.131495 |
| 265 | 4.621495 | 1.106954 | 14.0185  | 0.157526 |
| 266 | 4.83998  | 2.666907 | 2.760794 | 1.245    |

|     |          |          |          |          |
|-----|----------|----------|----------|----------|
| 267 | 4.816119 | 3.252519 | 0.000002 | 0        |
| 268 | 3.169911 | 6.354243 | 12.25193 | 1.070195 |
| 269 | 1.660756 | 3.924084 | 3.227448 | 9.996166 |
| 270 | 7.344664 | 0.133179 | 9.207932 | 4.903443 |
| 271 | 1.532419 | 7.185328 | 0.213476 | 3.593478 |
| 272 | 3.881011 | 0.792187 | 11.53895 | 0.210588 |
| 273 | 11.03146 | 2.464842 | 0.057627 | 0.177864 |
| 274 | 0        | 2.124439 | 4.241556 | 1.157668 |
| 275 | 0.892799 | 1.232004 | 2.838661 | 1.803556 |
| 276 | 3.322285 | 4.466581 | 1.282629 | 0        |
| 277 | 1.886248 | 4.298626 | 0        | 1.395826 |
| 278 | 3.313511 | 0.20761  | 6.706445 | 0.113408 |
| 279 | 0.373922 | 0.001965 | 15.95119 | 0.036578 |
| 280 | 0.846677 | 0.814403 | 0.596495 | 0.322263 |
| 281 | 0.448061 | 1.509409 | 6.279802 | 1.192376 |
| 282 | 2.479564 | 2.031162 | 0.343249 | 4.211602 |
| 283 | 1.414863 | 1.34299  | 1.650099 | 0        |
| 284 | 0.574356 | 1.542035 | 4.497995 | 8.574371 |
| 285 | 1.43108  | 0.061947 | 6.33722  | 4.003172 |
| 286 | 1.58472  | 0.556156 | 3.91169  | 0.076507 |
| 287 | 1.724353 | 0.285512 | 3.329726 | 0        |
| 288 | 1.840286 | 1.271365 | 0.725957 | 0.000035 |
| 289 | 0.086678 | 0.426771 | 0.841084 | 0.855747 |
| 290 | 0.353602 | 2.140943 | 2.964687 | 0.327893 |
| 291 | 0.100074 | 1.276038 | 8.618521 | 8.230175 |
| 292 | 5.569058 | 0.62335  | 5.476959 | 0.00001  |
| 293 | 1.542316 | 0        | 1.265103 | 0.482126 |
| 294 | 0.824409 | 7.026707 | 9.527028 | 0.596194 |
| 295 | 3.027397 | 2.102794 | 30.81778 | 0.609987 |
| 296 | 0.928488 | 1.011178 | 0.198765 | 0.61172  |
| 297 | 1.728975 | 0.999533 | 3.287259 | 0.751659 |
| 298 | 1.473142 | 0.549746 | 0.74981  | 8.875171 |
| 299 | 1.858739 | 2.486338 | 0        | 0.056551 |
| 300 | 2.57245  | 0.993712 | 1.805689 | 1.9077   |
| 301 | 4.237649 | 0.230221 | 0        | 0.727203 |
| 302 | 1.265016 | 0.638556 | 1.037962 | 0        |
| 303 | 1.165296 | 2.055199 | 2.318686 | 0        |
| 304 | 0.092824 | 3.072335 | 1.203405 | 1.735609 |
| 305 | 0        | 6.199544 | 1.945419 | 0        |
| 306 | 0.701878 | 3.472515 | 0.432122 | 0        |
| 307 | 2.781074 | 3.668314 | 4.345671 | 0.521067 |
| 308 | 1.051916 | 1.021521 | 0.085107 | 0.972109 |
| 309 | 2.282435 | 2.941057 | 11.95613 | 2.120749 |
| 310 | 0.45581  | 0.025548 | 4.695697 | 2.152009 |
| 311 | 1.971917 | 2.264278 | 16.13445 | 0.540661 |



|     |          |          |          |          |
|-----|----------|----------|----------|----------|
| 312 | 4.360135 | 1.285576 | 0.473123 | 0        |
| 313 | 2.055934 | 2.580702 | 5.903096 | 0.696386 |
| 314 | 1.159937 | 0.729041 | 0.744058 | 0        |
| 315 | 1.343202 | 3.343332 | 3.014933 | 0.206759 |
| 316 | 0.407209 | 0.17566  | 0.600774 | 0.297711 |
| 317 | 1.239533 | 0.189193 | 5.52474  | 0.153699 |
| 318 | 11.14247 | 1.687162 | 76.84817 | 2.891312 |
| 319 | 4.455798 | 0        | 1.174076 | 1.269889 |
| 320 | 2.037549 | 3.891907 | 1.000393 | 0.481952 |
| 321 | 1.126013 | 0        | 6.033703 | 0.016233 |
| 322 | 0.062134 | 3.246447 | 2.015531 | 0.613411 |
| 323 | 2.244247 | 1.181121 | 0.02357  | 0        |
| 324 | 0        | 2.224406 | 1.148483 | 0.147886 |
| 325 | 0.861509 | 2.955961 | 0.049681 | 2.763032 |
| 326 | 3.260305 | 2.871844 | 5.053376 | 7.516248 |
| 327 | 0.120937 | 0.378216 | 0.301248 | 0.694617 |
| 328 | 1.50886  | 1.452384 | 1.565832 | 0        |
| 329 | 1.174275 | 0.272336 | 9.164432 | 175.6647 |
| 330 | 0.219445 | 3.359534 | 2.226538 | 0.756197 |
| 331 | 0.597934 | 2.604609 | 11.07317 | 10.83819 |
| 332 | 1.129858 | 1.70969  | 13.15731 | 7.719053 |
| 333 | 0.384905 | 2.750628 | 0.137539 | 0.271126 |
| 334 | 1.156114 | 2.292169 | 1.563788 | 0        |
| 335 | 0.332121 | 2.492634 | 2.902347 | 0.451748 |
| 336 | 0.480433 | 1.062247 | 2.769483 | 2.696887 |
| 337 | 2.699338 | 0.276719 | 7.035954 | 1.098603 |
| 338 | 1.713217 | 4.867143 | 0.052791 | 1.269434 |
| 339 | 1.259266 | 4.859673 | 3.150525 | 0        |
| 340 | 0.668229 | 0.402251 | 60.61362 | 12.86485 |
| 341 | 0.080776 | 2.047708 | 0        | 0.619571 |
| 342 | 0        | 2.489381 | 0.823086 | 5.302389 |
| 343 | 2.370874 | 1.690233 | 0.528145 | 0.353765 |
| 344 | 0.362877 | 1.183891 | 0.588386 | 1.598076 |
| 345 | 0        | 0.410984 | 0        | 1.65392  |
| 346 | 0.74027  | 1.168351 | 1.537082 | 0.67656  |
| 347 | 14.37589 | 1.145658 | 1.534972 | 0.690744 |
| 348 | 0.550147 | 1.927388 | 4.928602 | 1.422798 |
| 349 | 32.50685 | 1.390888 | 0.130808 | 0.457213 |
| 350 | 3.021456 | 2.400426 | 0.036703 | 0.668134 |
| 351 | 2.658345 | 1.801425 | 0.794914 | 0.26579  |
| 352 | 1.730327 | 1.63127  | 1.366318 | 1.786122 |
| 353 | 0.963383 | 5.368588 | 0        | 0.484049 |
| 354 | 0.651608 | 1.174309 | 26.57725 | 0.346482 |
| 355 | 1.294256 | 0.489627 | 6.097633 | 3.144901 |
| 356 | 0        | 2.292539 | 0.06136  | 2.765009 |

|     |          |          |          |          |
|-----|----------|----------|----------|----------|
| 357 | 0.739401 | 2.381014 | 10.80638 | 0        |
| 358 | 1.207531 | 2.020035 | 0        | 0.886835 |
| 359 | 9.093703 | 1.552032 | 10.70862 | 3.869657 |
| 360 | 1.851678 | 2.785136 | 0.106158 | 0        |
| 361 | 0        | 0.540906 | 1.699612 | 0        |
| 362 | 2.483394 | 1.513747 | 1.077094 | 0.15804  |
| 363 | 0.818388 | 6.976588 | 0.920971 | 0        |
| 364 | 0.999481 | 1.021658 | 0.093316 | 0        |
| 365 | 10.53803 | 4.737379 | 5.38604  | 0        |
| 366 | 2.362127 | 0.207467 | 1.750614 | 0.001765 |
| 367 | 0.004384 | 0        | 0.822882 | 5.978426 |
| 368 | 2.588364 | 1.540764 | 0        | 0.429517 |
| 369 | 6.822505 | 3.006889 | 5.335003 | 0.606732 |
| 370 | 0.982553 | 1.408768 | 0.071622 | 0.928164 |
| 371 | 4.352823 | 2.551917 | 2.465338 | 10.97925 |
| 372 | 0.777037 | 2.220111 | 7.027366 | 1.373262 |
| 373 | 0.136879 | 1.49046  | 1.605603 | 0        |
| 374 | 7.641138 | 1.779695 | 0.000893 | 4.869215 |
| 375 | 0.1678   | 16.7113  | 1.800803 | 0        |
| 376 | 4.013798 | 1.956011 | 4.305315 | 0.164007 |
| 377 | 6.856476 | 0.956355 | 3.411398 | 0.433847 |
| 378 | 3.088453 | 1.671055 | 1.258921 | 0.33658  |
| 379 | 1.866732 | 1.381526 | 1.38563  | 0.188543 |
| 380 | 5.884314 | 0.290742 | 2.159455 | 0.238795 |
| 381 | 1.615564 | 0        | 13.67221 | 5.708106 |
| 382 | 1.615773 | 0        | 13.73967 | 5.718017 |
| 383 | 1.616194 | 0        | 13.93123 | 5.747465 |
| 384 | 1.620088 | 0        | 14.21589 | 5.813341 |
| 385 | 1.622971 | 0        | 14.34974 | 5.92521  |
| 386 | 1.630816 | 0        | 14.43248 | 5.933809 |
| 387 | 1.644752 | 0        | 14.52661 | 5.960032 |
| 388 | 1.660469 | 0        | 14.53776 | 5.973911 |
| 389 | 1.664199 | 0        | 14.56031 | 6.029552 |
| 390 | 1.677891 | 0        | 14.59297 | 6.348211 |
| 391 | 1.68497  | 0        | 14.60361 | 6.370281 |
| 392 | 1.693601 | 0        | 14.70636 | 6.445487 |
| 393 | 1.69721  | 0        | 14.72581 | 6.470671 |
| 394 | 1.69723  | 0        | 14.80999 | 6.473341 |
| 395 | 1.697745 | 0        | 14.98709 | 6.523916 |
| 396 | 1.755435 | 0        | 15.05917 | 6.56243  |
| 397 | 1.756609 | 0        | 15.19629 | 6.566415 |
| 398 | 1.793416 | 0        | 15.35009 | 6.591969 |
| 399 | 1.80441  | 0        | 15.42521 | 6.754191 |
| 400 | 1.82347  | 0        | 15.48363 | 6.865752 |
| 401 | 1.845323 | 0        | 15.65985 | 6.87816  |

|     |          |   |          |          |
|-----|----------|---|----------|----------|
| 402 | 1.849958 | 0 | 15.67128 | 6.972471 |
| 403 | 1.901487 | 0 | 16.07946 | 7.037363 |
| 404 | 1.930509 | 0 | 16.14048 | 7.10842  |
| 405 | 1.944391 | 0 | 16.24113 | 7.123897 |
| 406 | 1.961668 | 0 | 16.26916 | 7.399467 |
| 407 | 1.979295 | 0 | 16.28049 | 7.461163 |
| 408 | 2.025702 | 0 | 16.40346 | 7.48597  |
| 409 | 2.066158 | 0 | 16.51346 | 7.522762 |
| 410 | 2.073689 | 0 | 17.00546 | 7.533032 |
| 411 | 2.122656 | 0 | 17.45297 | 7.570982 |
| 412 | 2.129549 | 0 | 17.50389 | 7.581108 |
| 413 | 2.131325 | 0 | 17.59938 | 7.600405 |
| 414 | 2.152355 | 0 | 17.804   | 7.722333 |
| 415 | 2.184316 | 0 | 17.92639 | 7.812269 |
| 416 | 2.207038 | 0 | 18.07237 | 7.820808 |
| 417 | 2.333855 | 0 | 18.21188 | 7.946416 |
| 418 | 2.365069 | 0 | 18.39197 | 7.950542 |
| 419 | 2.381035 | 0 | 18.64255 | 8.126759 |
| 420 | 2.439037 | 0 | 18.72304 | 8.28823  |
| 421 | 2.521572 | 0 | 19.12922 | 8.312934 |
| 422 | 2.53803  | 0 | 19.58574 | 8.330563 |
| 423 | 2.568449 | 0 | 19.69918 | 8.391451 |
| 424 | 2.574825 | 0 | 19.90891 | 8.41256  |
| 425 | 2.59015  | 0 | 20.76068 | 8.904538 |
| 426 | 2.638579 | 0 | 21.19674 | 9.070307 |
| 427 | 2.650542 | 0 | 21.19956 | 9.109855 |
| 428 | 2.65254  | 0 | 21.42569 | 9.250245 |
| 429 | 2.884241 | 0 | 21.6861  | 9.290598 |
| 430 | 3.03396  | 0 | 21.70771 | 9.427911 |
| 431 | 3.042793 | 0 | 21.92958 | 9.482862 |
| 432 | 3.059737 | 0 | 22.12264 | 9.599834 |
| 433 | 3.089927 | 0 | 22.27921 | 9.759515 |
| 434 | 3.157048 | 0 | 22.82231 | 10.07438 |
| 435 | 3.440522 | 0 | 23.57613 | 10.1821  |
| 436 | 3.456632 | 0 | 23.60781 | 10.2901  |
| 437 | 3.621224 | 0 | 23.74266 | 10.49813 |
| 438 | 3.718717 | 0 | 24.21016 | 10.52061 |
| 439 | 3.769292 | 0 | 24.21866 | 10.56147 |
| 440 | 3.887092 | 0 | 24.49098 | 10.57067 |
| 441 | 3.888125 | 0 | 24.82883 | 10.59987 |
| 442 | 3.892692 | 0 | 25.52049 | 10.7516  |
| 443 | 3.910921 | 0 | 25.66616 | 10.87073 |
| 444 | 3.939417 | 0 | 25.88956 | 10.91652 |
| 445 | 3.946052 | 0 | 27.97141 | 11.01476 |
| 446 | 4.029166 | 0 | 28.44469 | 11.02559 |

|     |          |          |          |          |
|-----|----------|----------|----------|----------|
| 447 | 4.460652 | 0.000002 | 28.8651  | 11.345   |
| 448 | 4.467244 | 0.000002 | 29.24962 | 11.45767 |
| 449 | 4.528284 | 0.000003 | 29.39916 | 12.37942 |
| 450 | 4.563902 | 0.000004 | 30.35205 | 12.60208 |
| 451 | 4.752468 | 0.000005 | 30.99889 | 12.69623 |
| 452 | 4.834742 | 0.000006 | 31.08709 | 12.7738  |
| 453 | 4.93928  | 0.000007 | 31.40734 | 13.57324 |
| 454 | 4.961159 | 0.000009 | 31.98797 | 13.86025 |
| 455 | 5.191263 | 0.00001  | 32.17831 | 14.05056 |
| 456 | 5.285679 | 0.000017 | 32.94828 | 14.55381 |
| 457 | 5.355998 | 0.000026 | 33.37672 | 15.54347 |
| 458 | 5.592138 | 0.000035 | 33.50549 | 16.03132 |
| 459 | 5.665144 | 0.000046 | 33.57767 | 16.46384 |
| 460 | 5.921317 | 0.000053 | 33.82125 | 17.30528 |
| 461 | 6.577695 | 0.000061 | 35.34196 | 17.46161 |
| 462 | 7.078222 | 0.000071 | 35.40636 | 18.0166  |
| 463 | 7.261821 | 0.000095 | 35.7772  | 18.29724 |
| 464 | 7.26825  | 0.000121 | 39.18341 | 18.3752  |
| 465 | 7.325541 | 0.001229 | 39.26878 | 19.01922 |
| 466 | 7.377322 | 0.00278  | 39.9044  | 19.05149 |
| 467 | 7.842849 | 0.003662 | 40.37405 | 19.23259 |
| 468 | 8.266786 | 0.004641 | 43.84345 | 21.48838 |
| 469 | 8.292201 | 0.005735 | 43.93782 | 21.6793  |
| 470 | 8.476974 | 0.00608  | 44.22784 | 24.99003 |
| 471 | 8.765271 | 0.006495 | 45.80861 | 25.31709 |
| 472 | 9.430367 | 0.006807 | 46.44789 | 25.6589  |
| 473 | 9.475616 | 0.011691 | 46.9887  | 26.48599 |
| 474 | 9.51832  | 0.012263 | 52.35695 | 27.23297 |
| 475 | 10.82965 | 0.012852 | 56.68726 | 29.07285 |
| 476 | 10.95483 | 0.014326 | 62.18774 | 29.62806 |
| 477 | 11.0996  | 0.017111 | 66.73963 | 29.95816 |
| 478 | 11.90488 | 0.017317 | 78.94675 | 33.32956 |
| 479 | 20.96928 | 0.020333 | 79.58339 | 60.871   |
| 480 | 26.42697 | 0.022126 | 102.9902 | 72.96084 |
| 481 | 67.90919 | 0.029602 | 109.1897 | 0        |
| 482 | 0        | 2.594806 | 13.71319 | 0        |
| 483 | 0        | 2.643803 | 0.317427 | 0        |
| 484 | 0        | 2.678337 | 31.88578 | 0        |
| 485 | 0        | 2.711824 | 5.248456 | 0        |
| 486 | 0        | 2.716967 | 12.97991 | 0        |
| 487 | 0        | 2.720833 | 0.42078  | 0        |
| 488 | 0        | 2.776197 | 0.981797 | 0        |
| 489 | 0        | 2.812272 | 1.134808 | 0        |
| 490 | 0        | 2.817045 | 3.934361 | 0        |
| 491 | 0        | 2.82337  | 5.167496 | 0        |

|     |   |          |          |   |
|-----|---|----------|----------|---|
| 492 | 0 | 2.831319 | 0        | 0 |
| 493 | 0 | 2.844062 | 0.332892 | 0 |
| 494 | 0 | 2.869404 | 2.341255 | 0 |
| 495 | 0 | 2.94353  | 7.084705 | 0 |
| 496 | 0 | 2.951415 | 22.47036 | 0 |
| 497 | 0 | 3.023498 | 1.451662 | 0 |
| 498 | 0 | 3.033424 | 0.908028 | 0 |
| 499 | 0 | 3.111172 | 15.38962 | 0 |
| 500 | 0 | 3.117901 | 5.864313 | 0 |
| 501 | 0 | 3.130836 | 2.47466  | 0 |
| 502 | 0 | 3.134572 | 1.158772 | 0 |
| 503 | 0 | 3.148207 | 1.218476 | 0 |
| 504 | 0 | 3.159257 | 5.529702 | 0 |
| 505 | 0 | 3.230403 | 36.95343 | 0 |
| 506 | 0 | 3.236349 | 0.806079 | 0 |
| 507 | 0 | 3.252791 | 4.623528 | 0 |
| 508 | 0 | 3.273431 | 2.679192 | 0 |
| 509 | 0 | 3.280474 | 6.122354 | 0 |
| 510 | 0 | 3.287573 | 0        | 0 |
| 511 | 0 | 3.309302 | 1.382081 | 0 |
| 512 | 0 | 3.318902 | 0.371882 | 0 |
| 513 | 0 | 3.335701 | 0        | 0 |
| 514 | 0 | 3.360023 | 1.928014 | 0 |
| 515 | 0 | 3.387348 | 3.256011 | 0 |
| 516 | 0 | 3.436192 | 0.014064 | 0 |
| 517 | 0 | 3.46897  | 0.163772 | 0 |
| 518 | 0 | 3.514411 | 33.71253 | 0 |
| 519 | 0 | 3.522069 | 1.151772 | 0 |
| 520 | 0 | 3.572848 | 2.891513 | 0 |
| 521 | 0 | 3.574055 | 0.259969 | 0 |
| 522 | 0 | 3.598418 | 1.610473 | 0 |
| 523 | 0 | 3.695241 | 2.115446 | 0 |
| 524 | 0 | 3.711522 | 0.214194 | 0 |
| 525 | 0 | 3.73346  | 0        | 0 |
| 526 | 0 | 3.763015 | 0.310465 | 0 |
| 527 | 0 | 3.809959 | 0.607983 | 0 |
| 528 | 0 | 3.836917 | 0.96115  | 0 |
| 529 | 0 | 3.866834 | 6.198098 | 0 |
| 530 | 0 | 3.893181 | 2.107203 | 0 |
| 531 | 0 | 3.895187 | 0.002585 | 0 |
| 532 | 0 | 3.987588 | 4.836294 | 0 |
| 533 | 0 | 3.9988   | 1.727038 | 0 |
| 534 | 0 | 4.121249 | 31.18619 | 0 |
| 535 | 0 | 4.121652 | 6.453552 | 0 |
| 536 | 0 | 4.236448 | 2.074299 | 0 |

|     |          |          |          |          |
|-----|----------|----------|----------|----------|
| 537 | 0        | 4.316375 | 0        | 0        |
| 538 | 0        | 4.515746 | 3.494077 | 0        |
| 539 | 0        | 4.645809 | 7.450369 | 0        |
| 540 | 0        | 4.827638 | 0.737696 | 0        |
| 541 | 0        | 4.866762 | 7.996156 | 0        |
| 542 | 0        | 4.966439 | 0.165469 | 0        |
| 543 | 0        | 5.00792  | 0.174348 | 0        |
| 544 | 0        | 5.085554 | 0.60244  | 0        |
| 545 | 0        | 5.251812 | 1.24695  | 0        |
| 546 | 0        | 5.342275 | 5.653338 | 0        |
| 547 | 0        | 5.422957 | 13.57597 | 0        |
| 548 | 0        | 5.49003  | 0.666476 | 0        |
| 549 | 0        | 5.501513 | 1.8604   | 0        |
| 550 | 0        | 5.63238  | 0.363897 | 0        |
| 551 | 0        | 5.811923 | 0.676146 | 0        |
| 552 | 0        | 6.012147 | 0.325023 | 0        |
| 553 | 0        | 6.026976 | 0.226367 | 0        |
| 554 | 0        | 6.137846 | 8.512445 | 0        |
| 555 | 0        | 6.163914 | 0.172175 | 0        |
| 556 | 0        | 6.174683 | 2.211604 | 0        |
| 557 | 0        | 6.24824  | 0.799039 | 0        |
| 558 | 0        | 6.262638 | 6.321317 | 0.000504 |
| 559 | 0        | 6.572728 | 13.4754  | 0.001189 |
| 560 | 0        | 6.935209 | 0.838371 | 0.002027 |
| 561 | 0        | 6.951935 | 13.59439 | 0.002691 |
| 562 | 0        | 6.987323 | 0.037926 | 0.002744 |
| 563 | 0        | 7.510114 | 0.968912 | 0.004536 |
| 564 | 0        | 7.828604 | 1.081952 | 0.004873 |
| 565 | 0        | 8.293586 | 8.165104 | 0.006078 |
| 566 | 0        | 8.593862 | 0        | 0.011602 |
| 567 | 0        | 8.908294 | 0.018757 | 0.012301 |
| 568 | 0        | 9.411071 | 0.545756 | 0.013463 |
| 569 | 0        | 9.725566 | 29.83507 | 0.018123 |
| 570 | 0        | 10.10386 | 55.36219 | 0.01899  |
| 571 | 0        | 10.60479 | 4.939885 | 0.019047 |
| 572 | 0        | 11.20024 | 4.031281 | 0.021245 |
| 573 | 0        | 11.42357 | 9.537807 | 0.022274 |
| 574 | 0        | 11.73616 | 1.482642 | 0.022279 |
| 575 | 0        | 13.08389 | 0.710719 | 0.022615 |
| 576 | 0        | 15.91692 | 5.814776 | 0.023848 |
| 577 | 0        | 18.10442 | 14.75763 | 0.028834 |
| 578 | 0.000024 | 18.48084 | 26.72179 | 0.030173 |
| 579 | 0.007942 | 18.93353 | 1.782249 | 0.034024 |
| 580 | 0.011993 | 19.2903  | 5.601457 | 0.037711 |
| 581 | 0.015094 | 38.20158 | 1.684967 | 0.040404 |

|     |          |          |          |          |
|-----|----------|----------|----------|----------|
| 582 | 0.01523  | 68.68366 | 0.911103 | 0.046112 |
| 583 | 0.2076   | 1.066695 | 3.780789 | 0.048389 |
| 584 | 0.213476 | 0.594848 | 12.11846 | 0.050069 |
| 585 | 0.214506 | 0.598116 | 0.100251 | 0.052407 |
| 586 | 0.214628 | 0.598556 | 5.77666  | 0.052943 |
| 587 | 0.215701 | 0.599534 | 10.32398 | 0.054394 |
| 588 | 0.219067 | 0.604772 | 4.662205 | 0.06185  |
| 589 | 0.221194 | 0.607752 | 2.430649 | 0.062239 |
| 590 | 0.222472 | 0.609514 | 2.021326 | 0.064708 |
| 591 | 0.222493 | 0.611371 | 1.544365 | 0.065541 |
| 592 | 0.223069 | 0.615645 | 0.241879 | 0.073936 |
| 593 | 0.224924 | 0.617186 | 1.898699 | 0.076705 |
| 594 | 0.226    | 0.619222 | 0.303325 | 0.081121 |
| 595 | 0.227699 | 0.624457 | 0.526721 | 0.081838 |
| 596 | 0.231568 | 0.624951 | 4.376374 | 0.090873 |
| 597 | 0.23165  | 0.625955 | 0.007146 | 0.09294  |
| 598 | 0.233033 | 0.627119 | 24.04965 | 0.095976 |
| 599 | 0.234983 | 0.63067  | 0        | 0.09627  |
| 600 | 0.239389 | 1.135341 | 0.021514 | 0.096775 |
| 601 | 0.244034 | 1.145743 | 11.10003 | 0.100958 |
| 602 | 0.246306 | 1.150044 | 6.118797 | 0.101492 |
| 603 | 0.246308 | 1.159547 | 0.462607 | 0.108027 |
| 604 | 0.24649  | 1.165321 | 1.588721 | 0.114743 |
| 605 | 0.250732 | 1.167788 | 4.961691 | 0.118212 |
| 606 | 0.253061 | 1.173562 | 0.224337 | 0.124128 |
| 607 | 0.255824 | 1.174872 | 0.275382 | 0.127366 |
| 608 | 0.257082 | 1.18466  | 1.570129 | 0.129043 |
| 609 | 0.259211 | 1.189868 | 0        | 0.129461 |
| 610 | 0.25983  | 1.194772 | 0.382574 | 0.132661 |
| 611 | 0.260584 | 1.199706 | 3.859997 | 0.137493 |
| 612 | 0.266899 | 1.201039 | 0.841806 | 0.143109 |
| 613 | 0.269459 | 1.203989 | 0.559327 | 0.146233 |
| 614 | 0.270051 | 1.204353 | 0.221073 | 0.147697 |
| 615 | 0.270512 | 1.206742 | 6.888356 | 0.153108 |
| 616 | 0.272837 | 1.208118 | 0        | 0.158869 |
| 617 | 0.273327 | 1.214027 | 5.122329 | 0.163842 |
| 618 | 0.274231 | 1.218216 | 0.693085 | 0.164564 |
| 619 | 0.275569 | 1.219678 | 0        | 0.166894 |
| 620 | 0.276751 | 1.220736 | 5.161425 | 0.167379 |
| 621 | 0.280438 | 1.225152 | 4.569445 | 0.173294 |
| 622 | 0.280925 | 1.226982 | 1.447587 | 0.177861 |
| 623 | 0.280988 | 1.241345 | 1.804535 | 0.184013 |
| 624 | 0.283531 | 1.241611 | 0.741421 | 0.186613 |
| 625 | 0.285918 | 1.249982 | 0.525652 | 0.187121 |
| 626 | 0.297068 | 1.251743 | 8.597604 | 0.193567 |

|     |          |          |          |          |
|-----|----------|----------|----------|----------|
| 627 | 0.297134 | 1.254859 | 0        | 0.197798 |
| 628 | 0.298895 | 1.255913 | 10.97642 | 0.198864 |
| 629 | 0.300569 | 1.256962 | 0.147884 | 0.200795 |
| 630 | 0.304857 | 1.266422 | 3.503783 | 0.211013 |
| 631 | 0.305667 | 1.270183 | 1.90726  | 0.213657 |
| 632 | 0.306    | 1.272142 | 0.763024 | 0.21906  |
| 633 | 0.307091 | 1.288697 | 9.237228 | 0.222653 |
| 634 | 0.307537 | 1.30102  | 0.63348  | 0.228331 |
| 635 | 0.310534 | 1.301367 | 2.69892  | 0.229706 |
| 636 | 0.311659 | 1.305499 | 3.715692 | 0.231592 |
| 637 | 0.31381  | 1.307517 | 3.244883 | 0.232427 |
| 638 | 0.315054 | 1.308509 | 1.744554 | 0.234312 |
| 639 | 0.316719 | 1.311496 | 0.294217 | 0.237243 |
| 640 | 0.319325 | 1.312856 | 2.171165 | 0.237369 |
| 641 | 0.319581 | 1.321737 | 4.940927 | 0.243973 |
| 642 | 0.32119  | 1.325336 | 0.123509 | 0.246192 |
| 643 | 0.329083 | 1.328086 | 0.388311 | 0.247894 |
| 644 | 0.330116 | 1.340565 | 2.136634 | 0.249692 |
| 645 | 0.330297 | 1.340649 | 0        | 0.251068 |
| 646 | 0.330351 | 1.341889 | 4.854532 | 0.252932 |
| 647 | 0.330968 | 1.34487  | 9.869998 | 0.254909 |
| 648 | 0.33259  | 1.345994 | 7.745328 | 0.264524 |
| 649 | 0.335534 | 1.35659  | 0        | 0.26872  |
| 650 | 0.337984 | 1.371553 | 9.775977 | 0.270783 |
| 651 | 0.33822  | 1.373944 | 1.405599 | 0.271342 |
| 652 | 0.339913 | 1.387341 | 0.120616 | 0.276332 |
| 653 | 0.341993 | 1.396317 | 0.814936 | 0.280191 |
| 654 | 0.342216 | 1.408077 | 2.356825 | 0.280362 |
| 655 | 0.346145 | 1.424558 | 0.532941 | 0.281364 |
| 656 | 0.346318 | 1.424778 | 2.490797 | 0.283506 |
| 657 | 0.347583 | 1.428779 | 5.279267 | 0.284186 |
| 658 | 0.348516 | 1.448631 | 12.67731 | 0.287262 |
| 659 | 0.349056 | 1.450993 | 0.514323 | 0.287561 |
| 660 | 0.349171 | 1.451567 | 2.174294 | 0.288132 |
| 661 | 0.350254 | 1.462565 | 1.196895 | 0.288357 |
| 662 | 0.350899 | 1.468107 | 0.9853   | 0.290494 |
| 663 | 0.351103 | 1.472178 | 1.278146 | 0.297044 |
| 664 | 0.352657 | 1.47665  | 8.717086 | 0.306076 |
| 665 | 0.355569 | 1.480988 | 0.861648 | 0.308208 |
| 666 | 0.358459 | 1.48366  | 1.082021 | 0.30851  |
| 667 | 0.35893  | 1.484142 | 7.135645 | 0.310063 |
| 668 | 0.359418 | 1.496645 | 4.293584 | 0.312872 |
| 669 | 0.360008 | 1.498078 | 0.390448 | 0.316298 |
| 670 | 0.362888 | 1.498386 | 0.572036 | 0.318081 |
| 671 | 0.364145 | 1.509673 | 4.015563 | 0.321003 |



|     |          |          |          |          |
|-----|----------|----------|----------|----------|
| 672 | 0.36419  | 1.512694 | 0.635837 | 0.323432 |
| 673 | 0.365209 | 1.51309  | 15.85614 | 0.327647 |
| 674 | 0.372117 | 1.516379 | 0.626238 | 0.337242 |
| 675 | 0.373074 | 0.888164 | 0.001448 | 0.338053 |
| 676 | 0.374956 | 0.889099 | 0.59028  | 0.338149 |
| 677 | 0.37696  | 0.889123 | 0.799039 | 0.346246 |
| 678 | 0.37718  | 0.905471 | 1.521359 | 0.355521 |
| 679 | 0.381734 | 1.541278 | 4.783971 | 0.355884 |
| 680 | 0.382791 | 1.550602 | 4.276132 | 0.362962 |
| 681 | 0.387401 | 1.555413 | 0.48607  | 0.714173 |
| 682 | 0.390045 | 1.562024 | 1.414693 | 0.715113 |
| 683 | 0.390328 | 1.567213 | 56.13548 | 0.716721 |
| 684 | 0.608477 | 0.042093 | 1.567799 | 0.720901 |
| 685 | 0.6086   | 0.042139 | 0.010349 | 0.722461 |
| 686 | 0.614631 | 0.044848 | 1.953454 | 0.725404 |
| 687 | 0.616669 | 0.046402 | 4.720747 | 0.726987 |
| 688 | 0.617245 | 0.046485 | 24.06427 | 0.728572 |
| 689 | 0.618951 | 0.047594 | 0.738644 | 0.731244 |
| 690 | 0.619087 | 0.048242 | 0.079697 | 0.731866 |
| 691 | 0.61967  | 0.049055 | 3.509451 | 0.733815 |
| 692 | 0.621414 | 0.049376 | 2.579462 | 0.734427 |
| 693 | 0.621417 | 0.055482 | 0.343044 | 0.742388 |
| 694 | 0.630453 | 0.056507 | 3.707015 | 0.74408  |
| 695 | 0.631539 | 0.076029 | 2.403368 | 0.75574  |
| 696 | 0.635039 | 0.076949 | 1.936667 | 0.756194 |
| 697 | 0.635586 | 0.078563 | 3.798011 | 0.761026 |
| 698 | 0.643826 | 0.07918  | 9.686873 | 0.762179 |
| 699 | 0.650966 | 0.079218 | 6.891528 | 0.763159 |
| 700 | 0.651027 | 0.079606 | 2.294075 | 0.76337  |
| 701 | 0.656725 | 0.081932 | 1.79357  | 0.771987 |
| 702 | 0.657782 | 0.081983 | 10.09048 | 0.77274  |
| 703 | 0.659127 | 0.086564 | 0        | 0.792051 |
| 704 | 0.660188 | 0.124434 | 0        | 0.795281 |
| 705 | 0.663187 | 0.125835 | 0.966249 | 0.810489 |
| 706 | 0.66796  | 0.127281 | 2.10252  | 0.812748 |
| 707 | 0.668431 | 0.128273 | 1.712965 | 0.8155   |
| 708 | 0.679077 | 0.12992  | 0.990305 | 0.817435 |
| 709 | 0.681094 | 0.130423 | 1.51669  | 0.817755 |
| 710 | 0.682004 | 0.131198 | 2.178466 | 0.822393 |
| 711 | 0.684258 | 0.142188 | 9.155872 | 0.827398 |
| 712 | 0.686499 | 0.143805 | 8.537186 | 0.827983 |
| 713 | 0.691655 | 0.145088 | 19.48554 | 0.832566 |
| 714 | 0.693728 | 0.146086 | 23.64235 | 0.836369 |
| 715 | 0.699808 | 0.21474  | 31.90509 | 0.84643  |
| 716 | 0.702876 | 0.215675 | 0.57351  | 0.849032 |

|     |          |          |          |          |
|-----|----------|----------|----------|----------|
| 717 | 0.706701 | 0.217714 | 4.436879 | 0.849536 |
| 718 | 0.708978 | 0.220227 | 0.067738 | 0.851953 |
| 719 | 0.709095 | 0.223031 | 0.370947 | 0.8582   |
| 720 | 0.70922  | 0.224271 | 0.002536 | 0.863268 |
| 721 | 0.710658 | 0.22538  | 13.11056 | 0.866278 |
| 722 | 0.711035 | 0.233871 | 5.382293 | 0.876706 |
| 723 | 0.711828 | 0.234341 | 0.129833 | 0.878521 |
| 724 | 0.713741 | 0.234393 | 3.5767   | 0.880124 |
| 725 | 0.714592 | 0.234825 | 1.016424 | 0.885898 |
| 726 | 0.716321 | 0.235839 | 5.248575 | 0.890683 |
| 727 | 0.716536 | 0.237905 | 3.589245 | 0.893265 |
| 728 | 0.71946  | 0.239846 | 6.722868 | 0.895108 |
| 729 | 0.719463 | 0.310364 | 0.048027 | 0.895296 |
| 730 | 0.720215 | 0.310853 | 1.975014 | 0.901169 |
| 731 | 0.722134 | 0.314585 | 7.193093 | 0.901936 |
| 732 | 0.724108 | 0.315804 | 34.48398 | 0.905438 |
| 733 | 0.725193 | 0.31661  | 9.9519   | 0.9068   |
| 734 | 0.7295   | 0.316797 | 2.029839 | 0.907832 |
| 735 | 0.734451 | 0.32254  | 4.2648   | 0.923719 |
| 736 | 0.735975 | 0.323306 | 0.165191 | 0.928799 |
| 737 | 0.736441 | 0.323322 | 0.43557  | 0.929238 |
| 738 | 0.73791  | 0.325116 | 0        | 0.929515 |
| 739 | 0.742884 | 0.32568  | 0.13907  | 0.931342 |
| 740 | 0.747281 | 0.330734 | 1.796212 | 0.932915 |
| 741 | 0.749258 | 0.331884 | 18.328   | 0.938081 |
| 742 | 0.751588 | 0.334538 | 4.328718 | 0.938623 |
| 743 | 0.75224  | 0.338287 | 2.001578 | 0.945025 |
| 744 | 0.752368 | 0.341052 | 117.4194 | 0.946583 |
| 745 | 0.753748 | 0.350112 | 0.313445 | 0.947512 |
| 746 | 0.755249 | 0.35401  | 9.587405 | 0.951122 |
| 747 | 0.757316 | 0.359324 | 1.273074 | 0.952582 |
| 748 | 0.757722 | 0.402782 | 0.356311 | 0.956098 |
| 749 | 0.761915 | 0.403156 | 2.460556 | 0.958029 |
| 750 | 0.764765 | 0.404035 | 6.263782 | 0.959054 |
| 751 | 0.768142 | 0.405073 | 0.685451 | 0.969185 |
| 752 | 0.772093 | 0.405749 | 6.680782 | 0.969643 |
| 753 | 0.77222  | 0.408864 | 4.166165 | 0.969875 |
| 754 | 0.772684 | 0.409503 | 1.421821 | 0.970567 |
| 755 | 0.773611 | 0.412781 | 0.581888 | 0.972037 |
| 756 | 0.774035 | 0.412981 | 0        | 0.990316 |
| 757 | 0.783822 | 0.413733 | 2.120028 | 0.993869 |
| 758 | 0.785128 | 0.418214 | 3.306174 | 0.99981  |
| 759 | 0.785841 | 0.419627 | 1.128294 | 1.006519 |
| 760 | 0.794398 | 0.420724 | 0.045414 | 1.008805 |
| 761 | 0.794484 | 0.423377 | 3.533099 | 1.019098 |

|     |          |          |          |          |
|-----|----------|----------|----------|----------|
| 762 | 0.796058 | 0.423413 | 1.389176 | 1.019283 |
| 763 | 0.796736 | 0.424264 | 0.036729 | 1.020964 |
| 764 | 0.79787  | 0.428139 | 4.90206  | 1.023954 |
| 765 | 0.801005 | 0.430248 | 0.186703 | 1.025234 |
| 766 | 0.805753 | 0.430258 | 1.696488 | 1.026661 |
| 767 | 0.809084 | 0.432733 | 3.604919 | 1.027902 |
| 768 | 0.809816 | 0.433598 | 1.212598 | 1.030788 |
| 769 | 0.817307 | 0.435354 | 26.67655 | 1.049118 |
| 770 | 0.823869 | 0.438604 | 3.375489 | 1.063161 |
| 771 | 0.827582 | 0.43962  | 3.440702 | 1.064241 |
| 772 | 0.827785 | 0.443749 | 2.023757 | 1.065189 |
| 773 | 0.831407 | 0.448163 | 21.06509 | 1.071403 |
| 774 | 0.83436  | 0.451807 | 0.425692 | 1.077471 |
| 775 | 0.837282 | 0.452585 | 2.535985 | 1.078112 |
| 776 | 0.838645 | 0.456421 | 2.353545 | 1.079112 |
| 777 | 0.838859 | 0.463625 | 0.076557 | 1.081713 |
| 778 | 0.839453 | 0.472874 | 1.006695 | 1.083047 |
| 779 | 0.839908 | 0.476209 | 0.003414 | 1.095486 |
| 780 | 0.842744 | 0.476801 | 12.92868 | 1.099277 |
| 781 | 0.844191 | 0.479436 | 3.547053 | 1.102481 |
| 782 | 0.845023 | 0.483431 | 0.823217 | 1.103245 |
| 783 | 0.847204 | 0.48391  | 0.530253 | 1.105345 |
| 784 | 0.847737 | 0.485177 | 15.4354  | 1.113569 |
| 785 | 0.853015 | 0.485302 | 28.40264 | 1.127036 |
| 786 | 0.863748 | 0.491264 | 9.826236 | 1.135271 |
| 787 | 0.864928 | 0.493927 | 0.135907 | 1.142383 |
| 788 | 0.865365 | 0.496751 | 0.170254 | 1.14982  |
| 789 | 0.865491 | 0.497129 | 0.367055 | 1.151713 |
| 790 | 0.866442 | 0.497231 | 5.664783 | 1.165386 |
| 791 | 0.867367 | 0.497991 | 3.553856 | 1.167122 |
| 792 | 0.867682 | 0.499032 | 2.13147  | 1.169816 |
| 793 | 0.870984 | 0.499896 | 10.28248 | 1.179025 |
| 794 | 0.871676 | 0.501792 | 2.088975 | 1.186134 |
| 795 | 0.873829 | 0.51052  | 0.640558 | 1.186345 |
| 796 | 0.87641  | 0.51348  | 5.392857 | 1.199062 |
| 797 | 0.879424 | 0.513702 | 1.341257 | 1.200133 |
| 798 | 0.882394 | 0.515416 | 0.770067 | 1.209922 |
| 799 | 0.882599 | 0.517889 | 1.042826 | 1.217456 |
| 800 | 0.882982 | 0.518149 | 3.106896 | 1.221105 |
| 801 | 0.88661  | 0.519791 | 6.414501 | 1.226251 |
| 802 | 0.88905  | 0.522938 | 2.792062 | 1.232328 |
| 803 | 0.899615 | 0.527623 | 1.197232 | 1.235918 |
| 804 | 0.905881 | 0.528473 | 4.547339 | 1.275973 |
| 805 | 0.908378 | 0.541698 | 0        | 1.286464 |
| 806 | 0.908439 | 0.546208 | 9.71509  | 1.286925 |

|             |             |             |             |             |
|-------------|-------------|-------------|-------------|-------------|
| 807         | 0.908774    | 0.548992    | 0.486174    | 1.297534    |
| 808         | 0.908784    | 0.550313    | 80.65885    | 1.30279     |
| 809         | 0.910846    | 0.550798    | 1.423827    | 1.308296    |
| 810         | 0.912291    | 0.551029    | 0.191322    | 1.315397    |
| 811         | 0.917428    | 0.551046    | 14.20318    | 1.317296    |
| 812         | 0.918227    | 0.5532      | 2.520651    | 1.317766    |
| 813         | 0.918314    | 0.561437    | 0.247532    | 1.320497    |
| 814         | 0.923018    | 0.561745    | 5.376342    | 1.329098    |
| 815         | 0.928763    | 0.568209    | 0.321271    | 1.331455    |
| 816         | 0.935263    | 0.574519    | 0.987103    | 1.33411     |
| 817         | 0.936114    | 0.577184    | 12.13302    | 1.342142    |
| 818         | 0.937437    | 0.587514    | 1.077517    | 1.360999    |
| 819         | 0.942078    | 0.588454    | 29.65087    | 1.371962    |
| 820         | 0.943341    | 0.591073    | 5.986434    | 1.374879    |
| 821         | 0.948256    | 0.592993    | 13.82863    | 1.375556    |
| 822         | 0.948697    | 0.593324    | 3.491429    | 1.38743     |
| <b>Mean</b> | <b>1.98</b> | <b>2.05</b> | <b>8.21</b> | <b>2.64</b> |

**Figure 1C**  
**Source data**

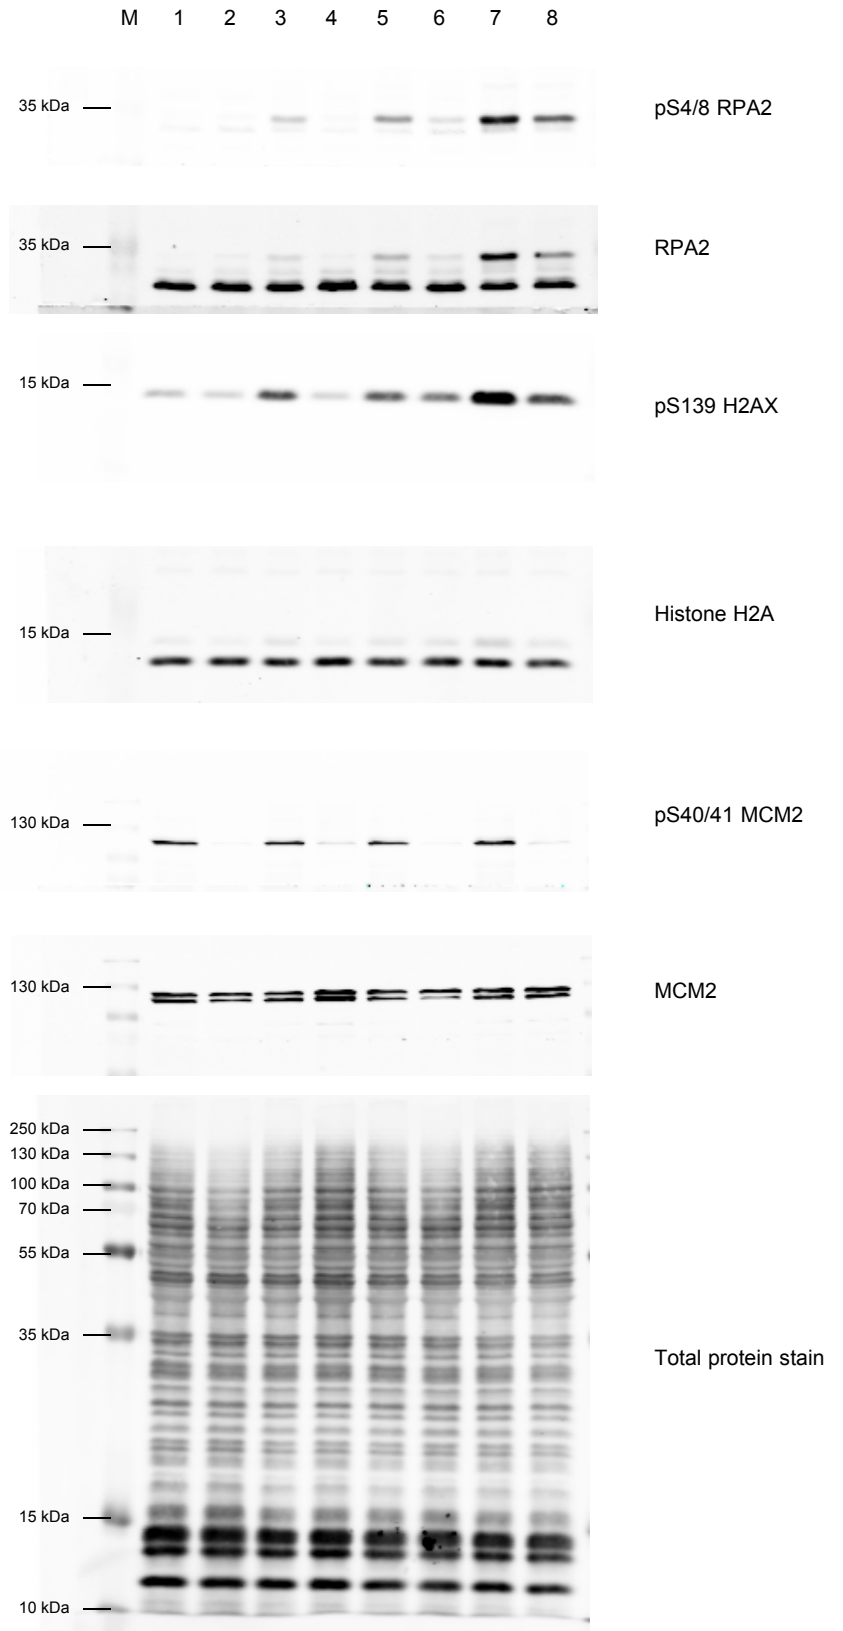

**Figure 1D**  
**Source data**

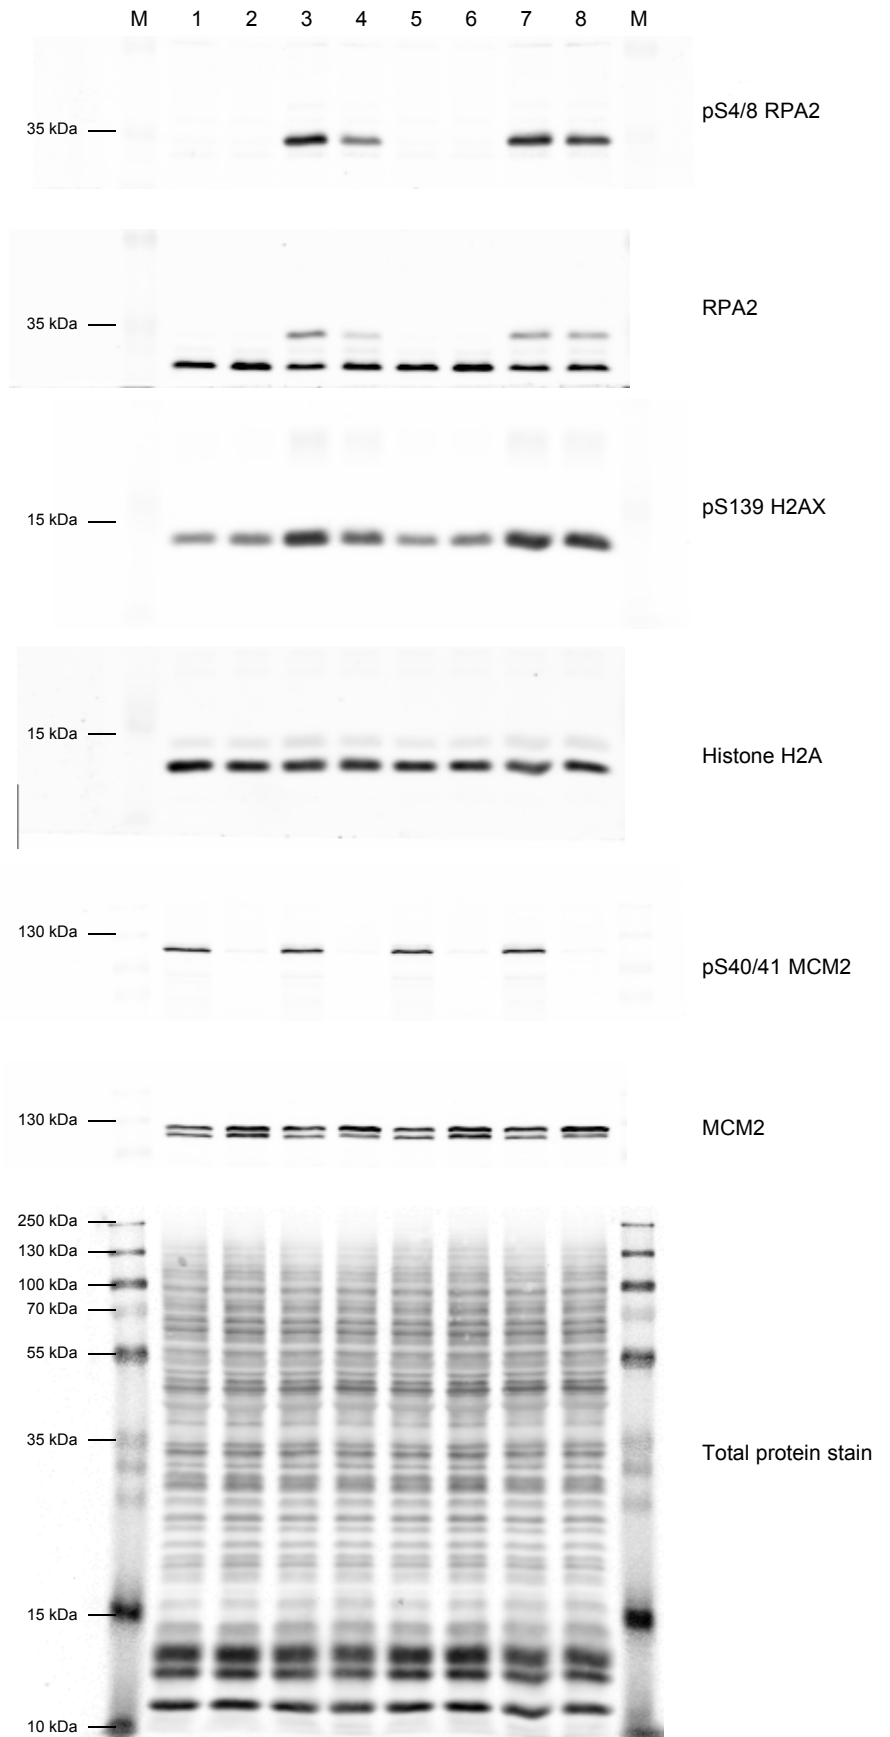

Supplement: EMBR-21-e48920-s003.pdf [file EMBR-21-e48920-s003.pdf]
