# Supplementary material for: CDC7 kinase promotes MRE11 fork processing, modulating fork speed and chromosomal breakage
Source: PubMed Central journal article supplement — EMBO Rep. 2020 Jun 4;21(8):e48920. doi: 10.15252/embr.201948920 (PMC7403700; doi:10.15252/embr.201948920), 2020-06-04
Supplement: EMBR-21-e48920-s004.pdf [file EMBR-21-e48920-s004.pdf]

**Figure 2B**  
**Source data**

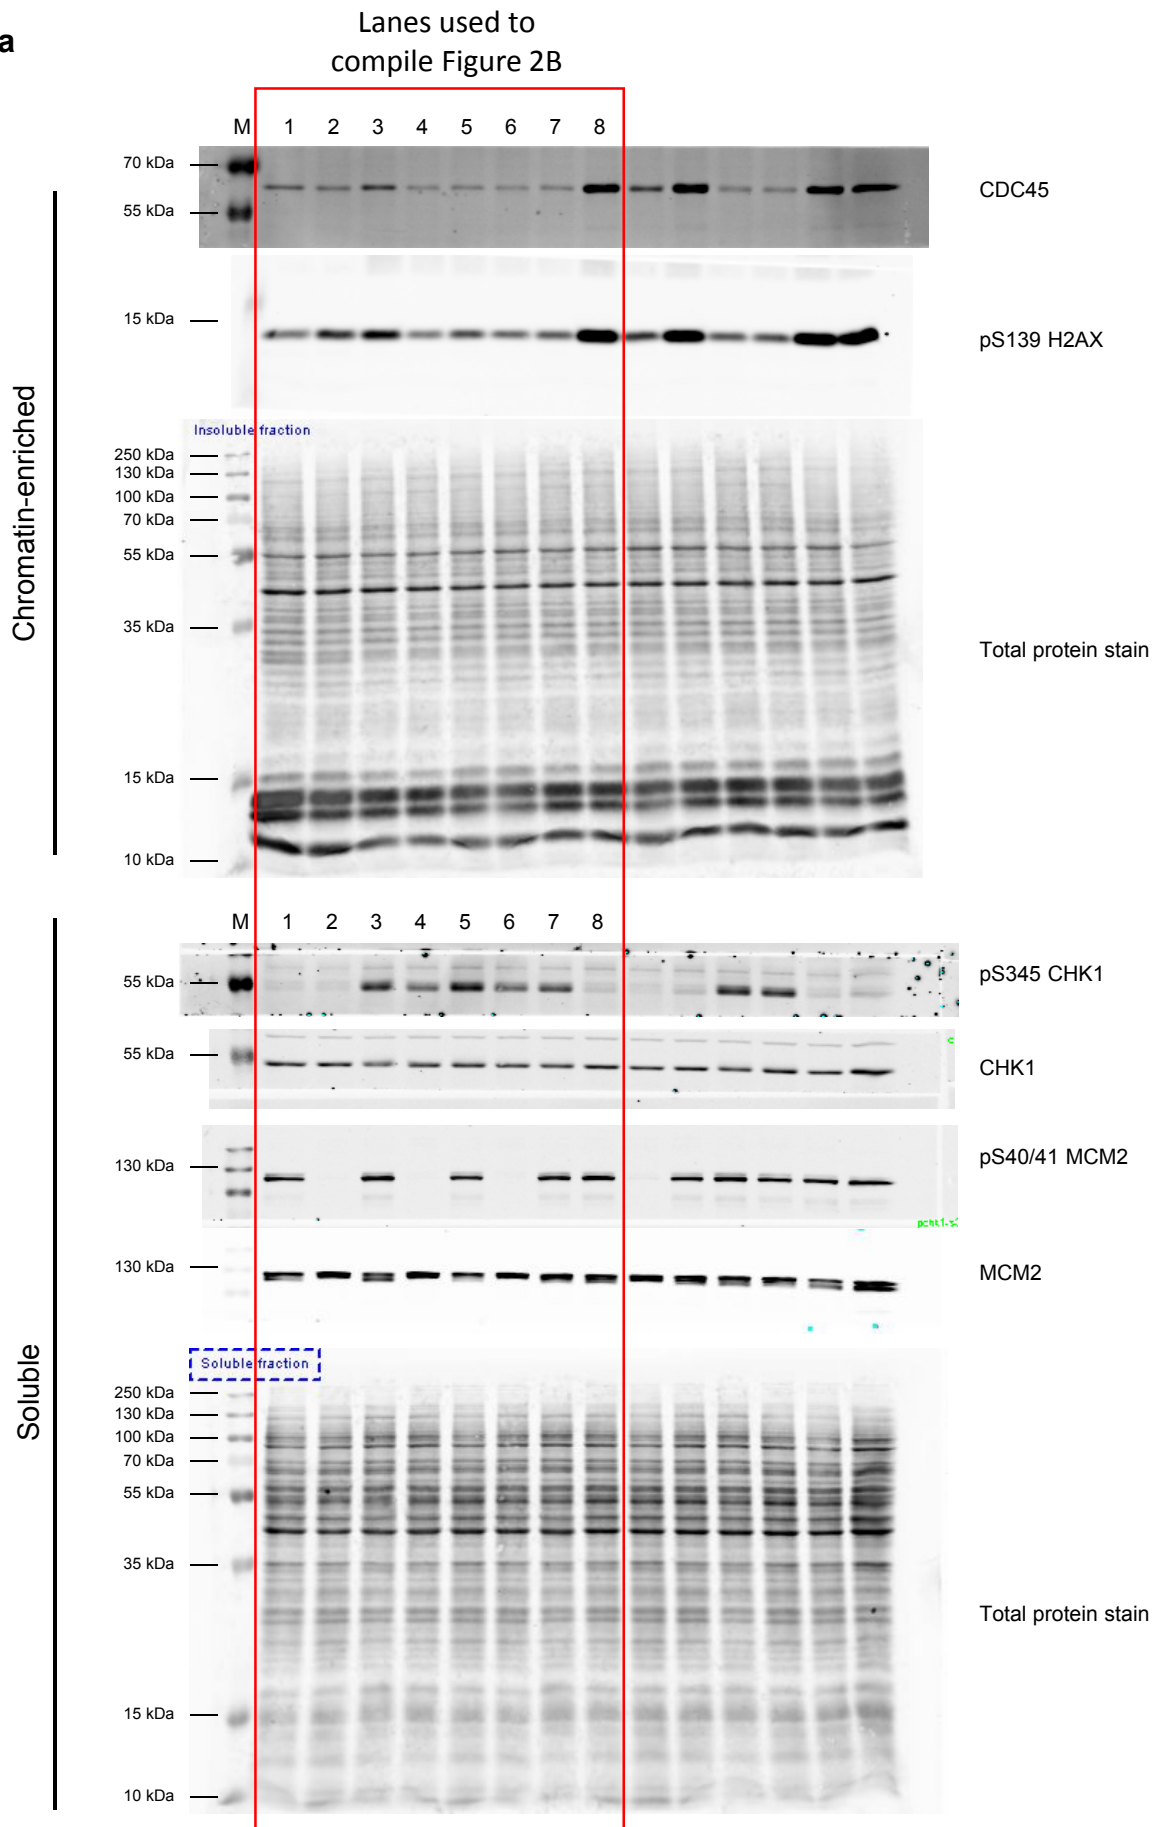

# Figure 2C, 2D and Appendix Figure S1 (Related to Figure2) Source data

Analysis after exclusion of debris and doublets

Analysis after exclusion of debris and doublets

Untreated  
24h

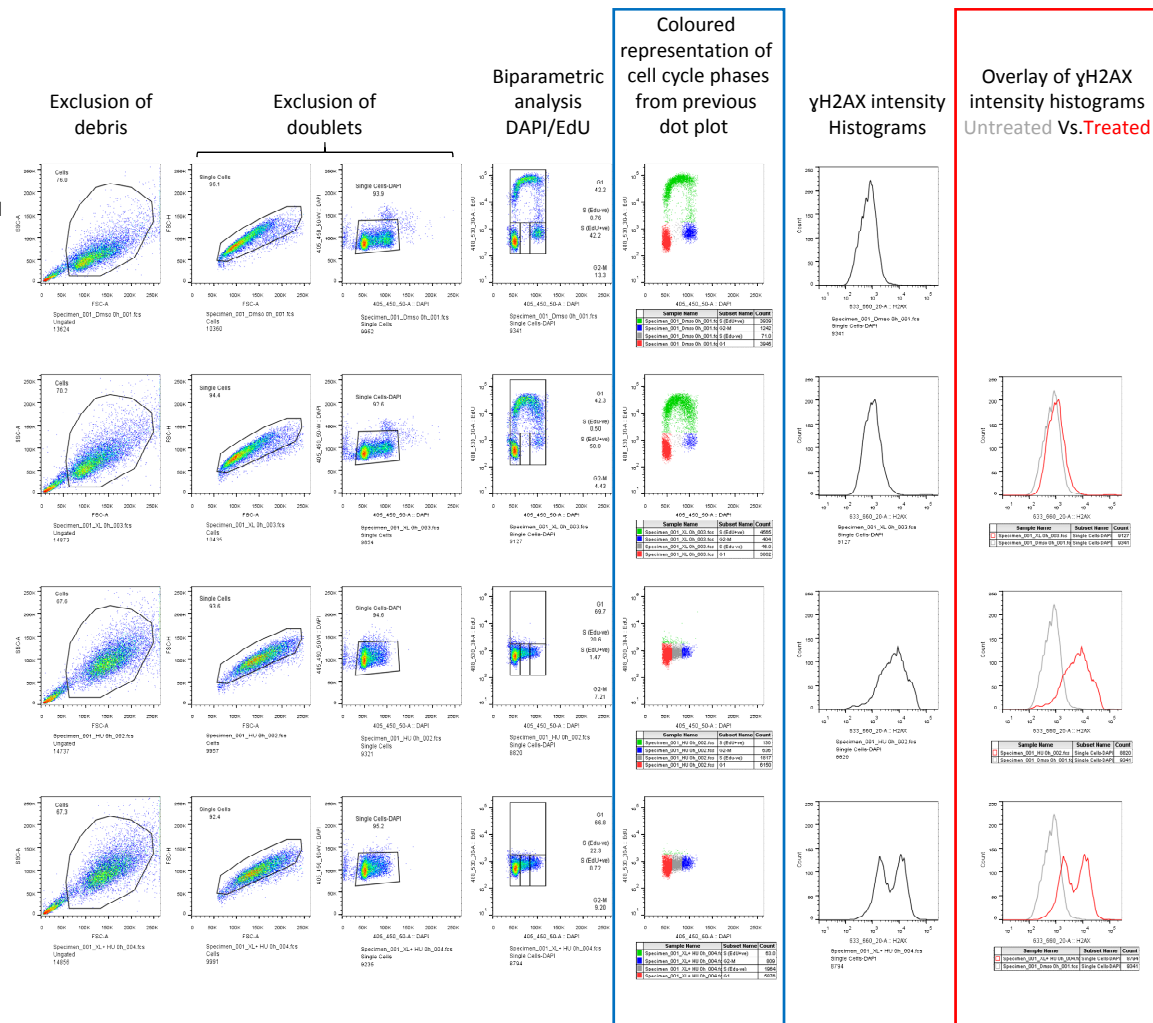

Biparametric analysis used for Appendix Figure S1

Histograms used for Figure 2C

Retreat  
HU 2h

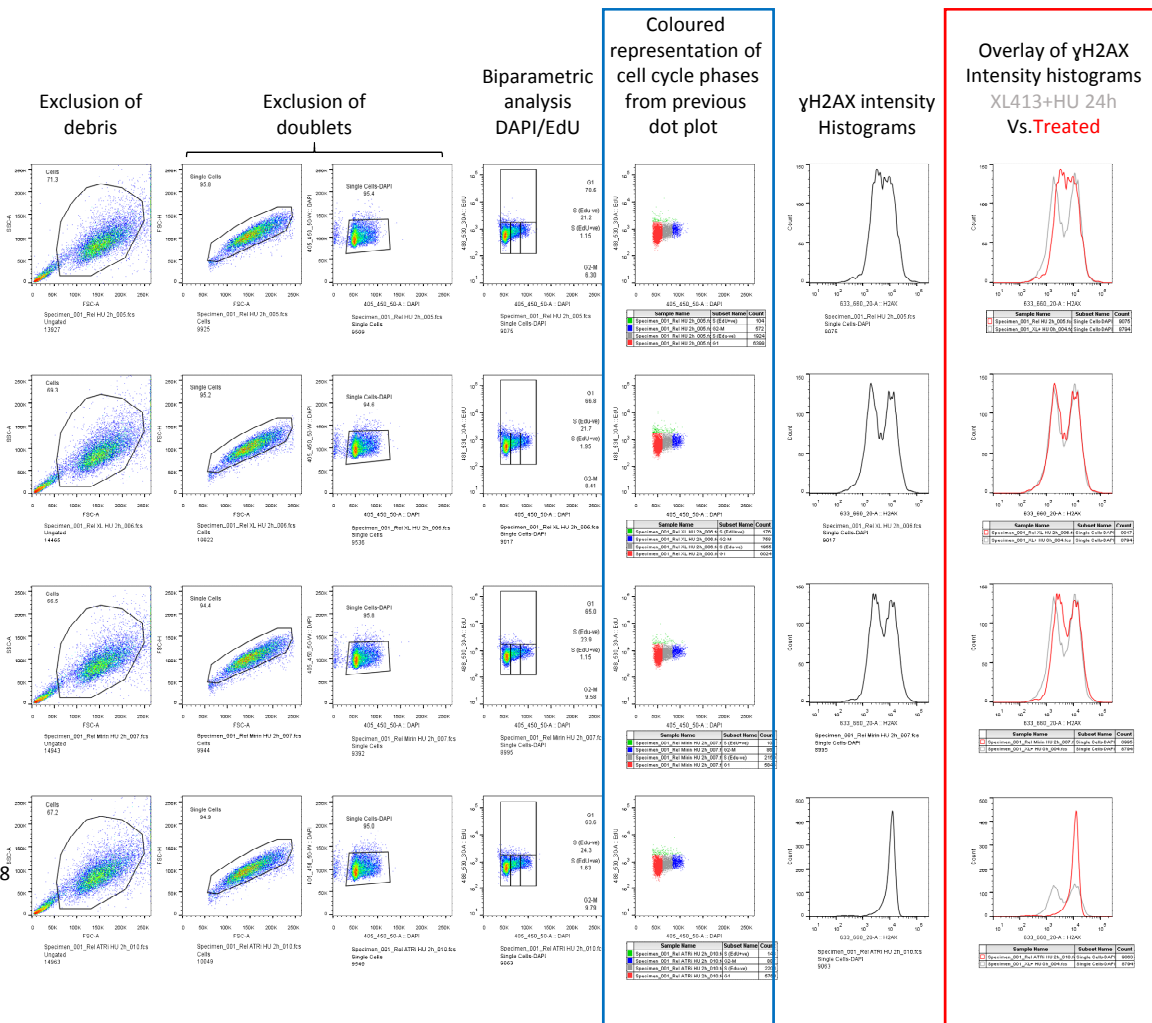

Biparametric analysis used for Appendix Figure S1

Histograms used for Figure 2D

XL413  
24h

HU  
24h

XL413  
+ HU 24h

Retreat  
XL413  
+ HU 2h

Retreat  
Mirin  
+ HU 2h

Retreat  
AZD6738  
+ HU 2h
