# Supplementary material for: CDC7 kinase promotes MRE11 fork processing, modulating fork speed and chromosomal breakage
Source: PubMed Central journal article supplement — EMBO Rep. 2020 Jun 4;21(8):e48920. doi: 10.15252/embr.201948920 (PMC7403700; doi:10.15252/embr.201948920), 2020-06-04
Supplement: EMBR-21-e48920-s005.pdf [file EMBR-21-e48920-s005.pdf]

**Figure 3A**  
Source data

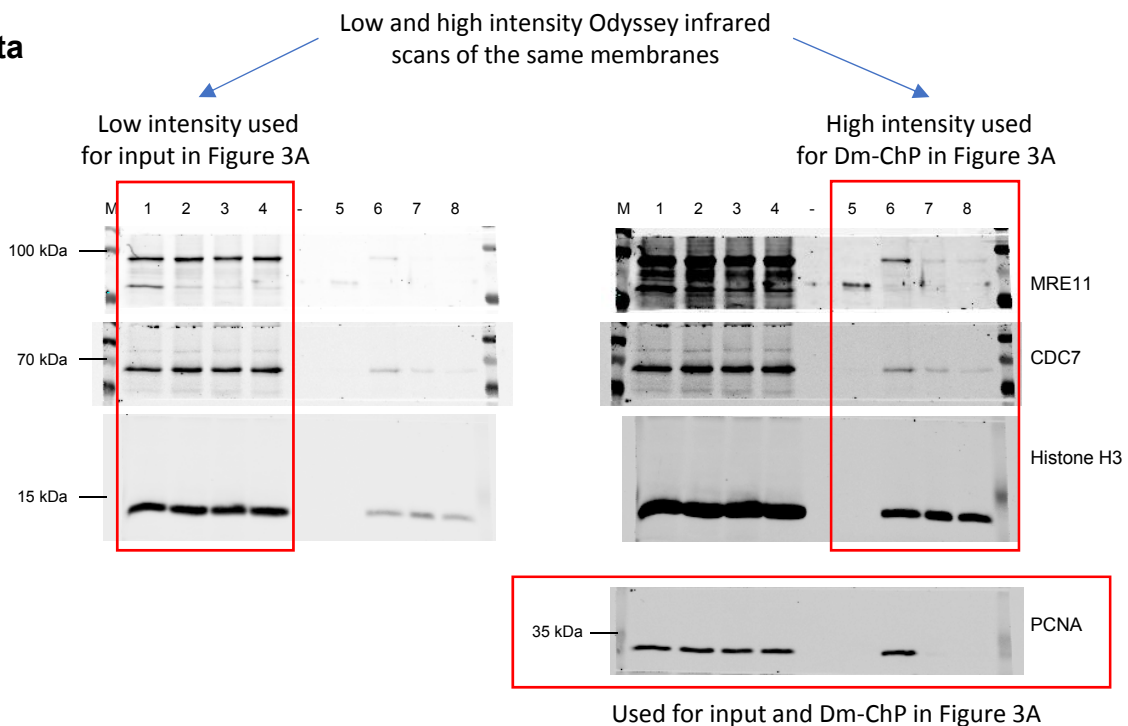

**Figure 3B**  
Source data

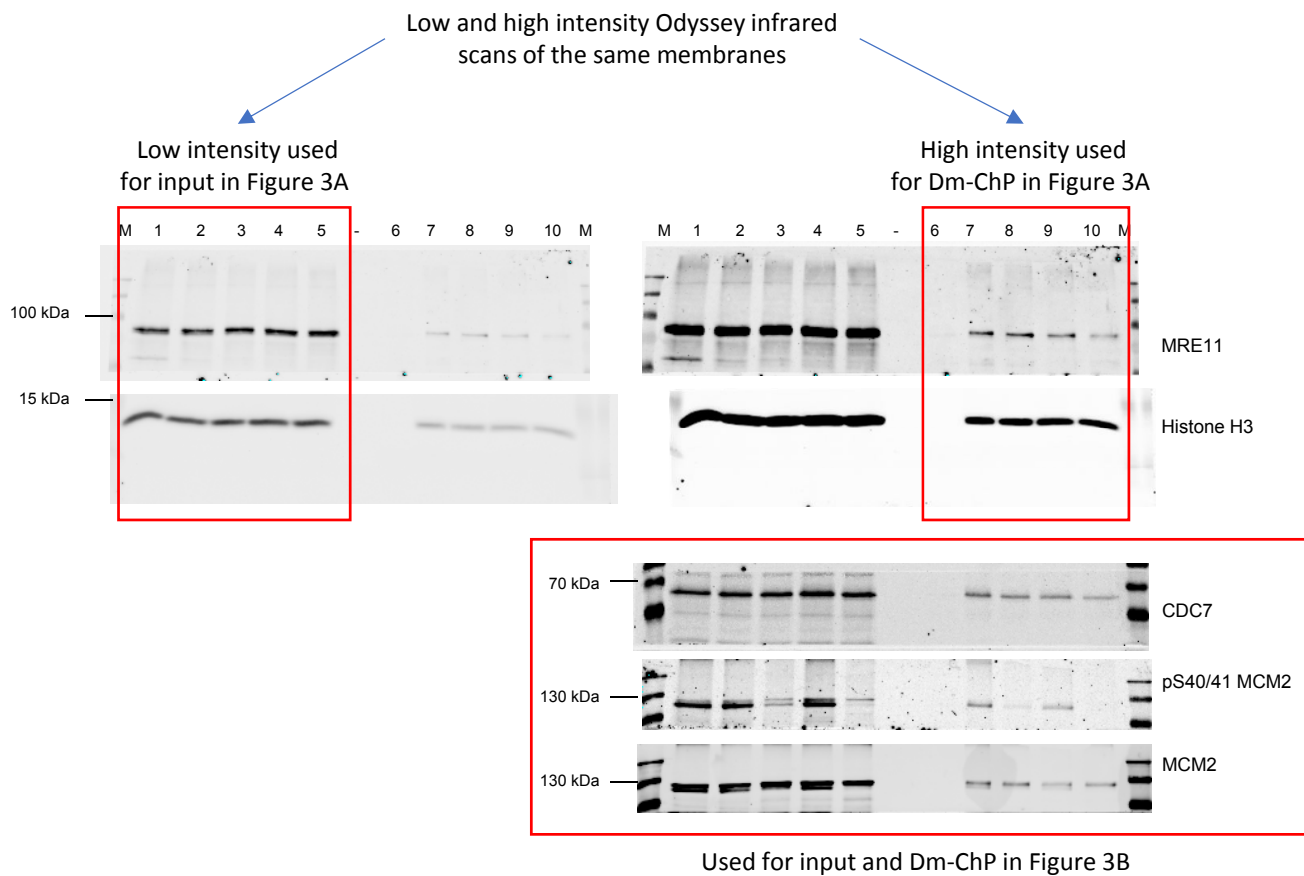

**Figure 3C**  
**Source data**

Low and high intensity Odyssey infrared scans of the same membranes

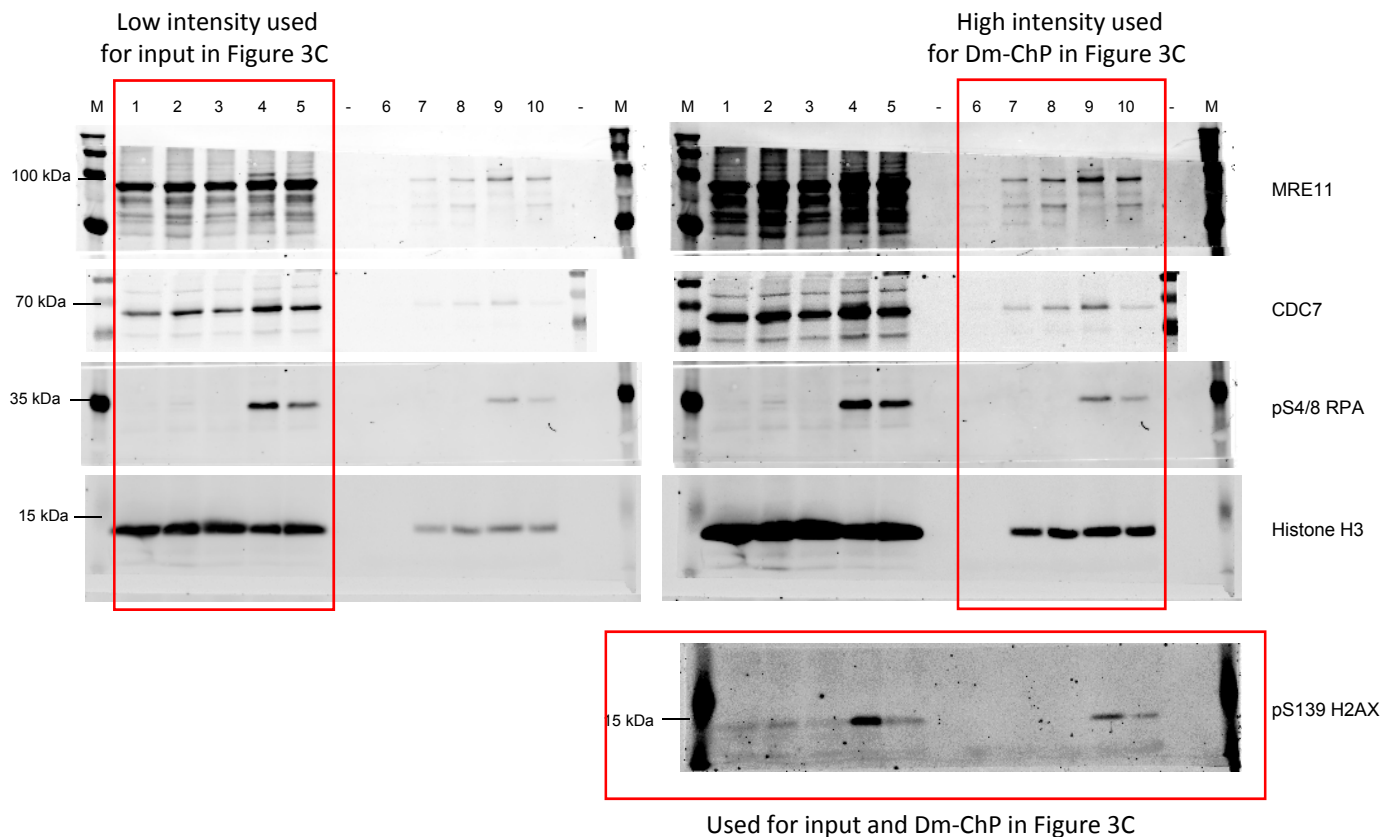

**Figure 3D**  
**Source data**

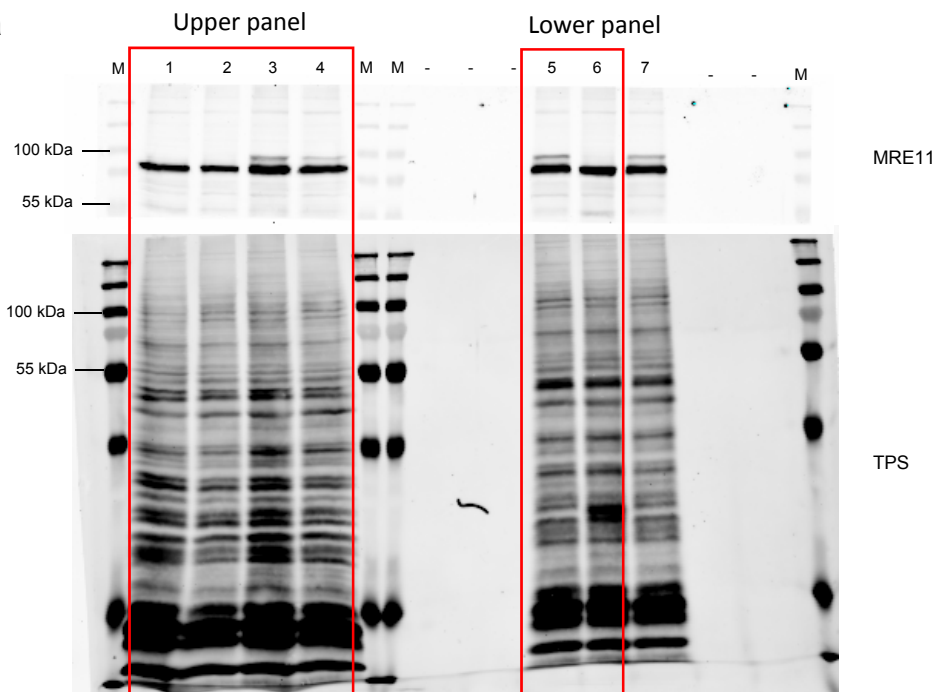

### Figure 3F source data

MRE11/PCNA Pearson correlation coefficient\_U2OS cells

| Experiment | HU       | HU + XL413 |
|------------|----------|------------|
| 1          | 0.251    | -0.183     |
| 2          | 0.188871 | -0.28658   |
| 3          | 0.211423 | -0.17922   |
| 4          | 0.159358 | -0.01947   |
