# Supplementary material for: CDC7 kinase promotes MRE11 fork processing, modulating fork speed and chromosomal breakage
Source: PubMed Central journal article supplement — EMBO Rep. 2020 Jun 4;21(8):e48920. doi: 10.15252/embr.201948920 (PMC7403700; doi:10.15252/embr.201948920), 2020-06-04
Supplement: EMBR-21-e48920-s006.pdf [file EMBR-21-e48920-s006.pdf]

**Figure 4A source data**

Percentage of IdU only tracks\_MCF10A cells

| Experiment | HU    | XL413 + HU |
|------------|-------|------------|
| 1          | 11.06 | 20.39      |
| 2          | 6.4   | 18.87      |
| 3          | 6.52  | 18.67      |

**Figure 4B source data**

Percentage of IdU only tracks\_U2OS cells

| Experiment | HU   | XL413 + HU | Mirin + HU | XL413 + Mirin + HU |
|------------|------|------------|------------|--------------------|
| 1          | 26   | 30.1       | 32.9       | 41.2               |
| 2          | 27.9 | 32.7       | 38.2       | 42.2               |
| 3          | 22.9 | 31.1       | 33.8       | 39.8               |
| 4          | 21.7 | 25         | 33.6       | 31                 |

**Figure 4C source data**

IdU/CldU tract length ratio\_U2OS cells (Mirin\_XL413\_CPT\_Fork speed)

|    | NT        | CPT       | XL413     | Mirin    | XL413 + CPT | Mirin + CPT | XL413 + Mirin | XL413 + Mirin + CPT |
|----|-----------|-----------|-----------|----------|-------------|-------------|---------------|---------------------|
| 1  | 0.9571429 | 0.4490322 | 0.8348624 | 0.846154 | 0.7444634   | 0.9390863   | 1             | 0.7122905           |
| 2  | 0.9331797 | 1.106339  | 1.357612  | 0.726465 | 1.13308     | 0.8164557   | 0.8992805     | 0.8516129           |
| 3  | 0.87269   | 0.925     | 0.9666667 | 0.644628 | 0.9250721   | 0.7348066   | 1.469298      | 0.866087            |
| 4  | 0.6627907 | 0.4577465 | 0.96823   | 0.721678 | 0.9320843   | 1.151832    | 0.9678457     | 0.93                |
| 5  | 1.037736  | 0.3159923 | 1.156977  | 1.363861 | 0.8918406   | 1.095679    | 0.6851064     | 0.6215754           |
| 6  | 1.051181  | 0.7186545 | 1.05642   | 1.066667 | 0.9233955   | 1.02069     | 1.128302      | 1.048159            |
| 7  | 1.103064  | 0.4092072 | 0.8488665 | 0.97235  | 1.150442    | 1.117949    | 1.149675      | 0.8255528           |
| 8  | 0.8445596 | 0.4194529 | 0.9224138 | 0.883469 | 1.144022    | 1.237113    | 0.884106      | 0.9565217           |
| 9  | 0.7521368 | 0.5912409 | 1.095714  | 0.685567 | 0.9926471   | 0.4405762   | 1.038028      | 1.510714            |
| 10 | 0.9946524 | 0.5825933 | 0.6956522 | 0.603211 | 0.7749004   | 0.862963    | 0.8023256     | 0.7181818           |
| 11 | 1.629771  | 0.43125   | 1.189349  | 1.009346 | 1.114144    | 1.123348    | 1             | 1.033033            |
| 12 | 0.7536232 | 0.4831081 | 0.5846154 | 0.949405 | 1.013384    | 0.8114286   | 1.251064      | 0.9488491           |
| 13 | 1.187023  | 0.8988506 | 1.071038  | 0.989712 | 0.8802521   | 0.4789474   | 1.450199      | 1.27881             |
| 14 | 1.033994  | 0.7338501 | 0.8434343 | 1.462857 | 0.9697987   | 0.7424594   | 0.9023256     | 1.426256            |
| 15 | 1.13834   | 0.5613207 | 0.7042607 | 0.845041 | 0.7225951   | 0.6765163   | 0.7905605     | 0.889881            |
| 16 | 0.6602452 | 0.5548589 | 1.202469  | 1.005952 | 1.230539    | 1.00995     | 1.025455      | 0.7226891           |
| 17 | 1.13449   | 0.3994491 | 1.11811   | 0.84953  | 0.8132388   | 0.5878788   | 0.7427259     | 1.113131            |
| 18 | 0.6374623 | 0.3767313 | 0.6380952 | 0.861953 | 0.9213483   | 1.119857    | 1.224044      | 0.9074074           |
| 19 | 0.8075397 | 0.5485714 | 0.5628141 | 1.169872 | 0.9092526   | 0.7477341   | 0.8471987     | 1.117257            |
| 20 | 0.5424107 | 0.587931  | 0.7439614 | 0.918495 | 1.306011    | 0.8202568   | 0.7288401     | 1.252446            |
| 21 | 0.8778948 | 0.5864486 | 0.8389262 | 0.991329 | 0.8486997   | 0.9305857   | 0.7323943     | 0.8628572           |
| 22 | 0.997921  | 0.3723197 | 0.978673  | 0.653959 | 0.7137255   | 0.9103448   | 0.7722772     | 1.010363            |
| 23 | 0.9861432 | 0.631884  | 0.9914712 | 1.210317 | 0.7904192   | 0.6435185   | 1.106227      | 0.6182796           |
| 24 | 0.9736842 | 0.454955  | 0.7696335 | 0.878345 | 1.121896    | 0.8470588   | 1.341837      | 0.6542208           |

|    |           |           |           |          |           |           |           |           |
|----|-----------|-----------|-----------|----------|-----------|-----------|-----------|-----------|
| 25 | 0.9205608 | 0.6027668 | 1.072072  | 1.032787 | 0.7198582 | 0.6745214 | 1.494012  | 1.11036   |
| 26 | 0.8230563 | 0.6959248 | 1.058696  | 1.25     | 0.9705882 | 0.3250444 | 1.149758  | 1.513595  |
| 27 | 0.7687861 | 1.30622   | 0.9245283 | 0.921779 | 1.113801  | 0.7388193 | 0.5501618 | 0.718638  |
| 28 | 0.5491329 | 0.6989247 | 0.8280802 | 0.728155 | 1.045918  | 1.081181  | 0.6855895 | 0.9032258 |
| 29 | 1.148026  | 0.375     | 0.8372943 | 0.667732 | 0.7398582 | 0.9246795 | 0.7705479 | 0.6442208 |
| 30 | 0.8855422 | 0.3245033 | 1.310606  | 0.980447 | 0.7070312 | 0.9845758 | 1.456621  | 1.241558  |
| 31 | 0.9885714 | 0.484127  | 0.7438525 | 0.676558 | 1.209974  | 0.8087855 | 0.7407407 | 0.5982796 |
| 32 | 1.265487  | 0.4987277 | 0.853012  | 0.647799 | 0.6394231 | 0.8091398 | 1.056561  | 0.6642208 |
| 33 | 1.006644  | 0.7536585 | 0.928     | 1.09542  | 0.7570563 | 0.5953125 | 0.8556701 | 1.394886  |
| 34 | 1.320122  | 0.3731343 | 0.91939   | 1.574344 | 0.9783784 | 1.325301  | 1.471429  | 1.011194  |
| 35 | 1.089231  | 0.5373494 | 0.79      | 0.961905 | 0.9082353 | 0.7645051 | 1.54703   | 0.8977778 |
| 36 | 0.8441558 | 0.5166667 | 0.9115282 | 0.899705 | 1.944805  | 0.6119403 | 0.6612022 | 1.17737   |
| 37 | 1.118421  | 0.6030151 | 0.6361829 | 0.930233 | 0.7770563 | 0.8660714 | 1.367491  | 0.7904192 |
| 38 | 0.8463855 | 0.7056277 | 1.239316  | 0.929231 | 0.5633588 | 0.8955224 | 1.218085  | 0.9077778 |
| 39 | 0.8878505 | 0.5409556 | 1.265152  | 0.979228 | 1.532637  | 0.4820717 | 1.058824  | 0.6026616 |
| 40 | 1.064677  | 0.5698925 | 0.8404558 | 1.019048 | 0.7555066 | 0.5565217 | 0.5848376 | 1.458484  |
| 41 | 1.067616  | 0.377451  | 0.8       | 0.953086 | 1.287671  | 1.065306  | 1.534722  | 0.8805556 |
| 42 | 0.8526971 | 0.5146199 | 0.974026  | 1.210526 | 0.6012931 | 1.407547  | 1.052265  | 0.7704192 |
| 43 | 0.8547945 | 0.398524  | 1.085366  | 1.066869 | 1.151943  | 0.9522388 | 0.9781553 | 0.7518248 |
| 44 | 0.9601227 | 0.6995074 | 1.227364  | 0.849123 | 1.328859  | 0.6629921 | 0.9966778 | 1.230769  |
| 45 | 0.5723577 | 0.6005291 | 0.8524946 | 0.960993 | 1.495098  | 0.4365079 | 0.9676259 | 1.27737   |
| 46 | 1.226027  | 0.6603774 | 0.8214286 | 1.063218 | 0.4267185 | 1.025773  | 1.334694  | 0.8904192 |
| 47 | 0.5253807 | 0.5685948 | 0.5056    | 0.821678 | 1.678241  | 0.3173653 | 1.367857  | 0.9177778 |
| 48 | 1.153005  | 0.6065586 | 0.8886957 | 1.072727 | 0.684     | 0.7633803 | 0.6864407 | 0.9311064 |
| 49 | 0.9933628 | 0.3680938 | 0.6570946 | 0.88785  | 1.158416  | 0.8122744 | 0.6415842 | 1.064067  |
| 50 | 0.4648956 | 0.5983782 | 0.8810573 | 1.101045 | 0.7516484 | 1.111111  | 0.892638  | 1.008264  |
| 51 | 0.5761317 | 0.5039827 | 0.781407  | 1.107143 | 1.372781  | 0.7892857 | 0.8065476 | 1.467033  |
| 52 | 1.196429  | 0.6273964 | 0.7090465 | 1.058824 | 0.704501  | 0.6624365 | 1.063954  | 0.5011709 |
| 53 | 0.9652928 | 0.6746373 | 0.5638978 | 0.628079 | 1.176638  | 0.8818681 | 0.9727891 | 0.9823322 |

|    |           |           |           |          |           |           |           |           |
|----|-----------|-----------|-----------|----------|-----------|-----------|-----------|-----------|
| 54 | 1.067762  | 0.9847363 | 0.8835165 | 1.103004 | 0.8208469 | 0.7288136 | 0.9420732 | 1.420617  |
| 55 | 0.9561129 | 0.7253404 | 0.6924342 | 0.868633 | 0.807393  | 0.9335938 | 0.9735294 | 0.8947368 |
| 56 | 0.7625786 | 0.3897876 | 0.5825243 | 0.701581 | 1.183746  | 0.9409594 | 0.7886435 | 1.207505  |
| 57 | 0.7043478 | 0.3078783 | 0.744186  | 1.403636 | 0.8542857 | 1.242915  | 0.6029412 | 0.8585858 |
| 58 | 0.9044369 | 0.517274  | 1.051919  | 1.051118 | 0.8164835 | 0.8453608 | 0.9685535 | 1.140845  |
| 59 | 0.7645161 | 0.4675429 | 0.6194969 | 1        | 0.9798793 | 1.11276   | 1.050847  | 1.130617  |
| 60 | 0.7304965 | 0.6       | 1.091139  | 0.864094 | 0.6274865 | 0.8409586 | 1.019455  | 1         |
| 61 | 0.9705883 | 0.3598976 | 1.138021  | 1.056856 | 0.9352052 | 0.8150538 | 0.8777778 | 0.9915374 |
| 62 | 0.9666667 | 0.6017353 | 0.9906542 | 0.963964 | 0.9584416 | 0.6770026 | 0.8615635 | 0.5582923 |
| 63 | 0.8278689 | 0.4872629 | 1.109589  | 0.818182 | 0.8508469 | 0.8078176 | 1.07947   | 0.6116323 |
| 64 | 0.743295  | 0.5839276 | 0.6875    | 0.896679 | 0.6336842 | 0.7607527 | 1.090634  | 1.440217  |
| 65 | 0.6861111 | 0.6738321 | 1.061776  | 1.065445 | 1.038251  | 0.9003559 | 1.584496  | 0.7942387 |
| 66 | 0.8815489 | 0.7483022 | 1.497672  | 0.726415 | 1.536585  | 1.238532  | 1.122892  | 1.51579   |
| 67 | 0.8403193 | 0.6453728 | 1.177011  | 0.990826 | 0.9619048 | 0.9810606 | 0.7429467 | 0.6837209 |
| 68 | 0.7659575 | 0.4253649 | 0.8271605 | 1.201031 | 1.027119  | 1.162162  | 0.8174387 | 1.297509  |
| 69 | 1.089744  | 0.7836252 | 0.9942085 | 1.143805 | 1.197368  | 0.8770026 | 0.9983606 | 0.7385478 |
| 70 | 1.221698  | 0.4263795 | 0.8515982 | 1.393333 | 0.9762931 | 0.9078176 | 0.7019089 | 1.150334  |
| 71 | 0.7375    | 0.7254637 | 0.5864865 | 0.877778 | 1.17833   | 0.8607527 | 0.8393939 | 1.190617  |
| 72 | 1.1375    | 0.5837528 | 0.6653061 | 0.693727 | 0.8708972 | 0.6748374 | 0.8009709 | 0.7135009 |
| 73 | 0.5846154 | 0.8988506 | 0.8450947 | 0.628079 | 1.20841   | 0.7348066 | 1.550123  | 1.297781  |
| 74 | 0.7874396 | 0.7338501 | 0.7860697 | 1.103004 | 0.7658536 | 1.251832  | 0.9028546 | 1.292084  |
| 75 | 1.002268  | 0.5613207 | 0.8430851 | 0.868633 | 1.151584  | 1.215679  | 0.8912305 | 0.9292948 |
| 76 | 0.6883562 | 0.5548589 | 0.9287926 | 0.701581 | 1.026316  | 1.12069   | 1.126545  | 0.8326839 |
| 77 | 0.6563467 | 0.3994491 | 0.7725632 | 1.403636 | 1.262712  | 1.087959  | 0.5872588 | 1.09104   |
| 78 | 1.012048  | 0.3767313 | 0.6216216 | 1.051118 | 0.8092243 | 1.347173  | 1.036544  | 0.9170684 |
| 79 | 0.6088083 | 0.5485714 | 0.5166341 | 1        | 1.08296   | 0.5207562 | 0.9271656 | 1.128326  |
| 80 | 0.4477825 | 0.587931  | 1.037543  | 0.864094 | 0.6526656 | 0.962963  | 0.7028403 | 1.262447  |
| 81 | 0.8664773 | 0.5864486 | 0.9606061 | 1.056856 | 1.131105  | 1.128848  | 0.7123944 | 0.9028876 |
| 82 | 0.996     | 0.3723197 | 0.6485149 | 0.963964 | 0.8295454 | 0.817656  | 0.7723562 | 1.130303  |

|             |             |             |             |             |             |             |             |             |
|-------------|-------------|-------------|-------------|-------------|-------------|-------------|-------------|-------------|
| 83          | 1.506579    | 0.631884    | 1.01581     | 0.818182    | 1.093023    | 0.4789474   | 1.207227    | 0.7488366   |
| 84          | 1.096154    | 0.454955    | 1.356073    | 0.821678    | 1.042155    | 0.7424594   | 1.259237    | 0.7248707   |
| 85          | 0.8319783   | 0.6027668   | 0.9219048   | 1.072727    | 0.7975904   | 0.6765163   | 1.390412    | 1.120094    |
| 86          | 1.034799    | 0.6959248   | 0.7880184   | 0.88785     | 1.307305    | 1.00995     | 1.160758    | 1.413595    |
| 87          | 0.9064327   | 1.40622     | 0.6194969   | 1.101045    | 0.5705522   | 0.5878788   | 0.8561618   | 0.718638    |
| 88          | 1.074468    | 0.6989247   | 1.091139    | 1.107143    | 1.060302    | 1.119857    | 0.7055423   | 0.8931948   |
| 89          | 1.074576    | 0.375       | 1.138021    | 1.058824    | 0.6374407   | 0.7477341   | 0.800548    | 0.6345408   |
| 90          | 0.7018633   | 0.3245033   | 0.9906542   | 0.628079    | 1.02        | 0.8202568   | 1.456703    | 1.211049    |
| 91          | 1.073434    | 0.484127    | 1.109589    | 1.103004    | 1.546269    | 0.9305857   | 0.7409807   | 0.6082753   |
| 92          | 1.027273    | 0.4987277   | 0.6875      | 0.868633    | 1.661442    | 0.9103448   | 1.156809    | 0.6542256   |
| 93          | 0.9463087   | 0.7536585   | 1.061776    | 0.701581    | 0.9352052   | 0.6435185   | 0.9056782   | 1.434805    |
| 94          | 0.8681592   | 0.3731343   | 1.467672    | 1.403636    | 0.9584416   | 0.8470588   | 1.511427    | 1.211796    |
| 95          | 1.026882    | 0.5373494   | 1.177011    | 1.051118    | 0.8508469   | 0.6745214   | 1.62709     | 0.9076907   |
| 96          | 0.9595588   | 0.5166667   | 0.8271605   | 1           | 0.6336842   | 0.6250444   | 0.7112221   | 1.172375    |
| 97          | 0.9344729   | 0.6030151   | 0.9942085   | 0.864094    | 1.038251    | 0.7388193   | 1.407449    | 0.79502     |
| 98          | 0.7889909   | 0.7056277   | 0.8515982   | 1.056856    | 1.536585    | 1.081181    | 1.208056    | 0.9073646   |
| 99          | 0.7883721   | 0.5409556   | 0.5864865   | 0.963964    | 0.9619048   | 0.9246795   | 0.9256569   |             |
| 100         | 0.5865801   | 0.5698925   | 0.6653061   | 0.818182    |             | 0.9845758   | 1.172151    |             |
| 101         |             | 0.377451    | 0.8450947   |             |             | 0.8087855   |             |             |
| 102         |             | 0.5146199   | 0.7860697   |             |             | 0.8091398   |             |             |
| 103         |             | 0.398524    |             |             |             | 0.5953125   |             |             |
| 104         |             | 0.6995074   |             |             |             |             |             |             |
| <b>Mean</b> | <b>0.91</b> | <b>0.58</b> | <b>0.90</b> | <b>0.96</b> | <b>0.99</b> | <b>0.86</b> | <b>1.01</b> | <b>0.98</b> |

### Figure 4D source data

IdU/CldU tract length ratio\_U2OS cells (siMRE11\_XL413\_CPT\_Fork speed)

|    | siCTL<br>NT | siCTL<br>CPT | siCTL<br>XL413 | siCTL<br>XL413 + CPT | siMRE11<br>NT | siMRE11<br>CPT | siMRE11<br>XL413 | siMRE11<br>XL413 + CPT |
|----|-------------|--------------|----------------|----------------------|---------------|----------------|------------------|------------------------|
| 1  | 1.225573    | 0.7251553    | 1.3125         | 0.7690387            | 0.7098151     | 0.5248227      | 0.6765922        | 0.6041056              |
| 2  | 0.7515401   | 0.5004421    | 0.9445755      | 0.8793104            | 0.6499239     | 0.9168646      | 0.8896734        | 0.7056075              |
| 3  | 0.9695652   | 0.501462     | 0.8653061      | 0.8751926            | 0.4862682     | 1.114286       | 1.44016          | 0.8578088              |
| 4  | 0.7005494   | 0.4550264    | 0.8235968      | 0.8886598            | 0.772296      | 0.8930041      | 0.9007561        | 1.048533               |
| 5  | 1.257642    | 0.4622871    | 0.5890183      | 1.276747             | 0.9588414     | 0.7697675      | 0.9454976        | 0.973822               |
| 6  | 0.4297521   | 0.4048387    | 0.6589862      | 0.9135978            | 1.189824      | 0.9302326      | 0.8995138        | 1.004658               |
| 7  | 0.6459627   | 0.3135359    | 0.8410448      | 0.8255814            | 0.6246684     | 0.4945887      | 0.7965879        | 1.001351               |
| 8  | 1.277251    | 0.7877013    | 0.9603174      | 1.151589             | 0.6046512     | 1.229814       | 1.129974         | 0.8995215              |
| 9  | 0.9555838   | 0.5696466    | 0.6402349      | 0.8377393            | 1.189493      | 0.8653846      | 1.039886         | 0.8858696              |
| 10 | 1.333333    | 0.6313364    | 1.226306       | 0.5409836            | 1.010616      | 0.7472924      | 0.6835067        | 1.04441                |
| 11 | 0.9080459   | 0.7297831    | 1.178363       | 0.3692038            | 0.888521      | 0.8726115      | 1.056277         | 0.8061798              |
| 12 | 0.7149532   | 0.283208     | 0.8555555      | 1.030928             | 0.927835      | 0.9684015      | 1.31003          | 0.678934               |
| 13 | 0.612326    | 0.7753846    | 0.7216374      | 1.013158             | 0.8347222     | 1.272016       | 0.8541667        | 0.7698784              |
| 14 | 0.6748604   | 0.9632278    | 1.173684       | 0.8105548            | 1.055357      | 0.9899194      | 0.8101761        | 0.6477916              |
| 15 | 0.7031872   | 0.5123367    | 0.9181669      | 0.9765625            | 0.9630873     | 0.8183594      | 0.9227848        | 0.6160714              |
| 16 | 1.172991    | 0.9556575    | 0.6369982      | 1.102102             | 0.8584906     | 0.9502688      | 0.7467072        | 0.7003257              |
| 17 | 0.7991138   | 0.3630528    | 0.7601919      | 0.9244936            | 0.9366306     | 0.5475664      | 0.8227176        | 0.94                   |
| 18 | 1.033962    | 0.6976321    | 0.8972142      | 1.06947              | 0.8494118     | 1.057234       | 0.7792732        | 0.702163               |
| 19 | 0.7029178   | 0.7710843    | 0.8902954      | 1.011765             | 0.6870027     | 0.7372881      | 0.6300148        | 0.9519038              |
| 20 | 0.7533287   | 0.3970433    | 1.032385       | 1.089286             | 0.9885387     | 0.7200647      | 0.9114441        | 0.822                  |
| 21 | 0.7421488   | 0.9046122    | 1.073761       | 0.9133016            | 0.8825758     | 0.6091298      | 1.184767         | 0.9526316              |
| 22 | 1.177083    | 0.8067915    | 0.7869898      | 0.4930362            | 0.872191      | 0.7381757      | 0.9029957        | 0.4350649              |
| 23 | 0.9355322   | 0.9983277    | 0.5122807      | 0.8468468            | 0.8769531     | 0.6088766      | 1.023677         | 0.7286325              |
| 24 | 0.9027397   | 0.4849138    | 0.4906915      | 0.6804348            | 0.6317992     | 0.9772423      | 1.207237         | 0.7459016              |

|    |           |           |           |           |           |           |           |           |
|----|-----------|-----------|-----------|-----------|-----------|-----------|-----------|-----------|
| 25 | 0.5877551 | 0.6679105 |           | 0.996129  | 0.870229  | 0.9130435 | 0.8707941 | 0.6402439 |
| 26 | 1.03006   | 0.7756184 | 1.207547  | 0.5930931 | 0.4854497 | 1.023173  | 0.5078236 | 0.5690323 |
| 27 | 0.9728132 | 0.7106145 | 0.9453061 | 0.9803922 | 1.064309  | 0.9866667 | 0.7981651 | 0.9166667 |
| 28 | 0.9274194 | 0.4253247 | 0.6121759 | 0.8491125 | 0.9297298 | 0.7818428 | 0.6121673 | 0.7495798 |
| 29 | 0.9143357 | 0.7147436 | 0.8482587 | 0.4608096 | 0.8198473 | 1.177738  | 1.071651  | 0.8504902 |
| 30 | 0.9556786 | 0.6391304 | 0.9052419 | 1.058091  | 0.917782  | 1.101533  | 0.7370304 | 0.7538266 |
| 31 | 1.074271  | 0.5243363 | 0.9208791 | 0.4720195 | 0.7347311 | 1.15      | 0.7089136 | 0.5641026 |
| 32 | 0.6567164 | 0.4988208 | 0.9254171 | 1.037209  | 0.791967  | 0.8264605 | 0.9895013 | 0.8395303 |
| 33 | 0.977221  | 0.2970711 | 0.6272352 | 0.6471631 | 0.9603961 | 0.87751   | 0.5013624 | 1.020472  |
| 34 | 0.472879  | 0.3853755 | 0.8480895 | 0.6613546 | 0.5153509 | 1.045226  | 1.233983  | 0.7345679 |
| 35 | 0.9978678 | 0.7152588 | 0.5710843 | 0.5093063 | 1.153745  | 0.8552632 | 1.041958  | 0.7944079 |
| 36 | 0.6971081 | 0.4533333 | 0.6       | 1.012165  | 0.8628258 | 1.168996  | 1         | 0.831094  |
| 37 | 0.7643885 | 1.110961  | 0.4421437 | 0.7864476 | 1.071121  | 0.8554642 | 1.120253  | 1.242788  |
| 38 | 1.089172  | 0.9328358 | 0.9478563 | 1.073203  | 0.6690962 | 0.942     | 1         | 0.8800461 |
| 39 | 0.844     | 0.9204546 | 1.155763  | 1.118497  | 0.8638298 | 0.8689459 | 0.672447  | 0.8236514 |
| 40 | 1.006431  | 0.9856397 | 1.261278  | 0.990099  | 1.037831  | 1.034351  | 0.8939732 | 0.99877   |
| 41 | 0.814     | 0.8333333 | 0.6392405 | 0.787037  | 0.719697  | 1.01711   | 1.004367  | 0.8987993 |
| 42 | 0.6965251 | 0.6       | 0.5567567 | 1.004831  | 0.8008475 | 0.9636363 | 1.014451  | 0.8945274 |
| 43 | 0.8727599 | 0.5044118 | 1.102394  | 0.7134935 | 0.7349206 | 0.9674796 | 1.030303  | 0.9411058 |
| 44 | 0.6884615 | 0.6759259 | 1.090062  | 0.6145161 | 0.692691  | 0.598301  | 1.137313  | 0.7051282 |
| 45 | 0.4994206 | 0.3042017 | 0.6206896 | 0.4694408 | 0.6971015 | 0.709062  | 0.8043478 | 1.056058  |
| 46 | 0.7951389 | 0.4262537 | 0.8651685 | 0.6153846 | 0.8909853 | 0.576     | 0.9193549 | 0.8230519 |
| 47 | 1.290727  | 0.7525773 | 0.6820144 | 0.8969359 | 0.9320176 | 0.7631579 | 0.883547  | 0.6218488 |
| 48 | 1.048544  | 0.7295238 | 0.4224924 | 0.800759  | 1.024719  | 1.034853  | 1.059925  | 0.8578596 |
| 49 | 1.083135  | 0.8490566 | 0.7695167 | 0.8690096 | 0.6561983 | 0.5525114 | 1.012841  | 0.778865  |
| 50 | 0.4909457 | 0.8264605 | 0.4618096 | 0.6302083 | 0.8008049 | 1.023438  | 0.6533333 | 0.9098901 |
| 51 | 0.7425743 | 0.535     | 0.489917  | 0.9002079 | 1.021583  | 0.7860082 | 0.4695788 | 1         |
| 52 | 0.8632479 | 0.5303226 | 0.5508366 | 0.5883871 | 1.36828   | 1.04232   | 0.8909091 | 0.6500994 |
| 53 | 0.7627628 | 0.4765101 | 0.7337192 | 0.8776671 | 0.8777292 | 1.194444  | 0.6247848 | 0.7851986 |

|    |           |           |           |           |           |           |           |           |
|----|-----------|-----------|-----------|-----------|-----------|-----------|-----------|-----------|
| 54 | 0.6225426 | 0.6861314 | 0.5738255 | 0.556338  | 0.8755556 | 0.5720054 | 0.762431  | 1.027682  |
| 55 | 0.5141903 | 0.888535  | 0.615894  | 0.7858586 | 0.9503546 | 0.9233871 | 0.9825    | 0.7188049 |
| 56 | 0.8923445 | 0.6781473 | 0.9556136 | 0.7615207 | 1.077093  | 0.9171271 | 0.5710784 | 0.6255144 |
| 57 | 1.065645  | 0.4004425 | 0.9606815 | 0.6366366 | 0.9725274 | 1.146465  | 0.7690217 | 0.455     |
| 58 | 1.020588  | 0.554785  | 0.9128386 | 0.9896907 | 0.8383085 | 0.7721089 | 0.7839416 | 0.7172775 |
| 59 | 0.7062374 | 0.5427842 | 0.5150862 | 0.886076  | 0.8736842 | 0.7309091 | 0.8139535 | 0.469352  |
| 60 | 0.7955801 | 0.8163437 | 0.6666667 | 1.007444  | 1.27223   | 0.8028169 | 0.9011554 | 0.7203792 |
| 61 | 1.025045  | 0.2783172 | 0.9032258 | 0.9721116 | 1.026786  | 0.7695985 | 0.4397394 | 0.6189555 |
| 62 | 0.9081456 | 0.3858974 | 0.6553673 | 1.103291  | 0.7095343 | 0.9106002 | 0.5638032 | 0.716141  |
| 63 | 1.037807  | 0.4962264 | 1.002439  | 0.6091837 | 0.5879557 | 1.014975  | 0.9884058 | 0.9445783 |
| 64 | 0.7971919 | 1.107943  | 0.8550186 | 1.084507  | 1.115854  | 1.099679  | 0.7760479 | 1.234266  |
| 65 | 1.141876  | 0.4932203 | 0.4307305 | 1.210738  | 1.009368  | 1.054775  | 0.9       | 0.8503401 |
| 66 | 1.057339  | 0.5801527 | 0.7259616 | 0.8477905 | 0.8323831 | 0.9768451 | 0.7066327 | 0.8242245 |
| 67 | 0.9667251 | 0.4220878 | 0.6891892 | 0.5978552 | 0.9922118 | 0.9863014 | 1.187207  | 0.6983871 |
| 68 | 0.6047009 | 0.6777778 | 1.091936  | 0.3568147 | 1.227397  | 0.812987  | 0.6776557 | 0.9244186 |
| 69 | 0.8247262 | 0.4217586 | 0.6101426 | 0.7454545 | 1.123786  | 0.9278846 | 0.8160377 | 0.9788079 |
| 70 | 0.8306451 | 0.4816626 | 0.5077519 | 0.5815384 | 1.284211  | 1.035533  | 0.7991071 | 0.8898305 |
| 71 | 1.291913  | 0.7860169 | 1.054242  | 0.8578199 | 0.7452007 | 0.7927928 | 0.9212254 | 0.9024857 |
| 72 | 0.9524862 | 0.494186  | 0.9688507 | 0.6819728 | 0.858209  | 1.146868  | 1.334773  | 0.7362745 |
| 73 | 0.9559055 | 0.4843049 | 0.6698912 | 0.952     | 0.5462478 | 0.7057416 | 0.9738637 | 0.7659575 |
| 74 | 0.8040404 | 0.6932223 | 0.7369707 | 0.8093093 | 0.9702128 | 0.9410319 | 0.8128931 | 0.7625418 |
| 75 | 1.009195  | 0.8028455 | 0.7541494 | 0.8390597 | 0.5984456 | 0.6997793 | 0.8158333 | 0.7252011 |
| 76 | 1.073099  | 0.7178771 | 1.293578  | 0.8265139 | 1.070783  | 1.09322   | 1.137734  | 0.8175474 |
| 77 | 0.6344086 | 0.9338374 | 0.8421788 | 0.8436831 | 0.863711  | 0.9731861 | 0.9617563 | 0.9652551 |
| 78 | 0.5071685 | 0.4806723 | 0.8744681 | 1.217899  | 1.229907  | 0.8346334 | 0.9410431 | 0.7725714 |
| 79 | 0.9457143 | 0.5114155 | 1.145923  | 0.7952468 | 0.6538461 | 0.6894118 | 1.028192  | 0.7658487 |
| 80 | 0.8243452 | 0.4       | 0.7364747 | 0.7791842 | 0.7713178 | 0.7478873 | 0.5635965 | 0.4056497 |
| 81 | 0.9491525 | 0.7553398 | 1.087948  | 0.8152655 | 0.9659443 | 0.6984479 | 0.9788079 | 0.9688889 |
| 82 | 0.902571  | 0.4716981 | 0.8915817 | 1.147619  | 0.8761553 | 0.8153846 | 0.7911392 | 1.304688  |



|     |           |           |           |           |           |           |           |           |
|-----|-----------|-----------|-----------|-----------|-----------|-----------|-----------|-----------|
| 83  | 0.6278118 | 0.6048387 | 0.9975699 | 1.204836  | 0.5865922 | 0.7713937 | 0.6694599 | 0.8234501 |
| 84  | 0.8697524 | 0.7225807 | 1.083227  | 1.205882  | 0.6946688 | 0.7752293 | 0.6966774 | 1.172697  |
| 85  | 0.8832998 | 0.3665644 | 0.8769752 | 1.258806  | 0.7949886 | 0.7323943 | 0.8052257 | 0.970278  |
| 86  | 0.7960603 | 0.5447761 | 0.942268  | 0.9078404 | 0.5941011 | 0.7525083 | 0.6695527 | 1.027534  |
| 87  | 0.5043732 | 0.6555387 | 0.9272727 | 0.3333333 | 0.7484407 | 0.8946236 | 1.038509  | 1.031363  |
| 88  | 0.8601533 | 0.5870842 | 0.7695391 | 1.19207   | 0.7669903 | 1.056995  | 0.5965997 | 1.009804  |
| 89  | 0.9058296 | 0.5384616 | 0.8311445 | 0.8701189 | 1.018382  | 0.5844749 | 1.039488  | 1.088353  |
| 90  | 1.072131  | 0.8483965 | 1.144703  | 0.8047211 | 0.9409594 | 0.8817345 | 0.9792208 | 0.9234393 |
| 91  | 0.7050847 | 0.56621   | 0.8876582 | 0.5990692 | 0.8005182 | 0.9026946 | 0.7012579 | 1.207254  |
| 92  | 1.015957  | 0.4570597 | 0.7345455 | 0.9431438 | 0.875     | 0.6052999 | 0.9140969 | 1.106977  |
| 93  | 0.9312715 | 0.6543967 | 0.4059098 | 0.7828746 | 0.6427184 | 0.8680688 | 0.4472681 | 0.9502408 |
| 94  | 0.6351792 | 0.8872902 | 1.240446  | 0.9218062 | 0.6818182 | 0.8828502 | 0.8314732 | 1.152125  |
| 95  | 0.6941813 | 0.9110807 | 0.9889503 | 0.5286145 | 0.8776371 | 0.6937394 | 0.7984791 | 1.071349  |
| 96  | 0.7578829 | 0.6515354 | 0.9386921 | 0.8990099 | 0.6       | 0.8854337 | 0.7025797 | 1.083447  |
| 97  | 0.6636501 | 0.6362069 | 0.8190476 | 0.9223301 | 0.9059081 | 0.7132442 | 0.8594771 | 0.4637514 |
| 98  | 0.8263889 | 0.5229268 | 0.4651163 | 0.5533454 | 0.6759003 | 0.6157083 | 0.5213068 | 0.6558704 |
| 99  |           | 0.761062  | 0.7597955 | 0.9574037 | 0.4829192 | 0.8395574 | 0.7186978 | 0.5517241 |
| 100 |           |           | 0.9550073 | 0.6907693 | 0.626539  | 0.932225  | 0.462536  |           |
| 101 |           |           | 0.5347044 | 1.052326  | 0.6247961 | 0.7918288 | 0.9149485 |           |
| 102 |           |           | 0.9911894 | 0.9189189 | 1.081633  | 0.6688852 | 0.7954092 |           |
| 103 |           |           | 1.325803  | 1.065168  | 0.9710982 | 0.477089  | 0.671521  |           |
| 104 |           |           | 1.009682  | 0.6136364 | 0.7420495 | 0.4808219 | 0.6042885 |           |
| 105 |           |           | 0.7568741 | 0.8951613 | 0.9216966 | 0.7228327 | 0.75      |           |
| 106 |           |           | 1.175627  | 0.9452055 | 0.8942029 | 0.6498195 | 0.9532019 |           |
| 107 |           |           | 0.4951456 | 0.8513762 | 0.9892666 |           | 0.3659259 |           |
| 108 |           |           | 1.280488  | 0.8680203 | 0.7874396 |           | 0.6945055 |           |
| 109 |           |           | 1.088     | 0.7604268 | 0.7452693 |           | 0.3681592 |           |
| 110 |           |           | 0.537112  | 0.9050967 |           |           | 0.5106707 |           |
| 111 |           |           | 0.7006472 | 1.041096  |           |           |           |           |

|             |             |             |             |             |             |             |             |             |
|-------------|-------------|-------------|-------------|-------------|-------------|-------------|-------------|-------------|
| 112         |             |             | 0.9415205   | 0.6395349   |             |             |             |             |
| 113         |             |             | 0.8195212   | 0.3713318   |             |             |             |             |
| 114         |             |             | 0.601626    |             |             |             |             |             |
| 115         |             |             | 0.8161954   |             |             |             |             |             |
| 116         |             |             | 0.8390958   |             |             |             |             |             |
| 117         |             |             | 0.4201077   |             |             |             |             |             |
| 118         |             |             | 0.4192771   |             |             |             |             |             |
| 119         |             |             | 0.8983402   |             |             |             |             |             |
| 120         |             |             | 0.9354166   |             |             |             |             |             |
| 121         |             |             | 0.7184801   |             |             |             |             |             |
| 122         |             |             | 0.8205462   |             |             |             |             |             |
| 123         |             |             | 1.058659    |             |             |             |             |             |
| 124         |             |             | 0.7524753   |             |             |             |             |             |
| 125         |             |             | 0.8006483   |             |             |             |             |             |
| 126         |             |             | 0.9426848   |             |             |             |             |             |
| 127         |             |             | 0.613941    |             |             |             |             |             |
| 128         |             |             | 0.4668821   |             |             |             |             |             |
| <b>Mean</b> | <b>0.86</b> | <b>0.63</b> | <b>0.83</b> | <b>0.84</b> | <b>0.86</b> | <b>0.86</b> | <b>0.84</b> | <b>0.84</b> |
