# Supplementary material for: CDC7 kinase promotes MRE11 fork processing, modulating fork speed and chromosomal breakage
Source: PubMed Central journal article supplement — EMBO Rep. 2020 Jun 4;21(8):e48920. doi: 10.15252/embr.201948920 (PMC7403700; doi:10.15252/embr.201948920), 2020-06-04
Supplement: EMBR-21-e48920-s007.pdf [file EMBR-21-e48920-s007.pdf]

**Figure 5B**  
**Source data**

Lanes used to  
compile Figure 5B

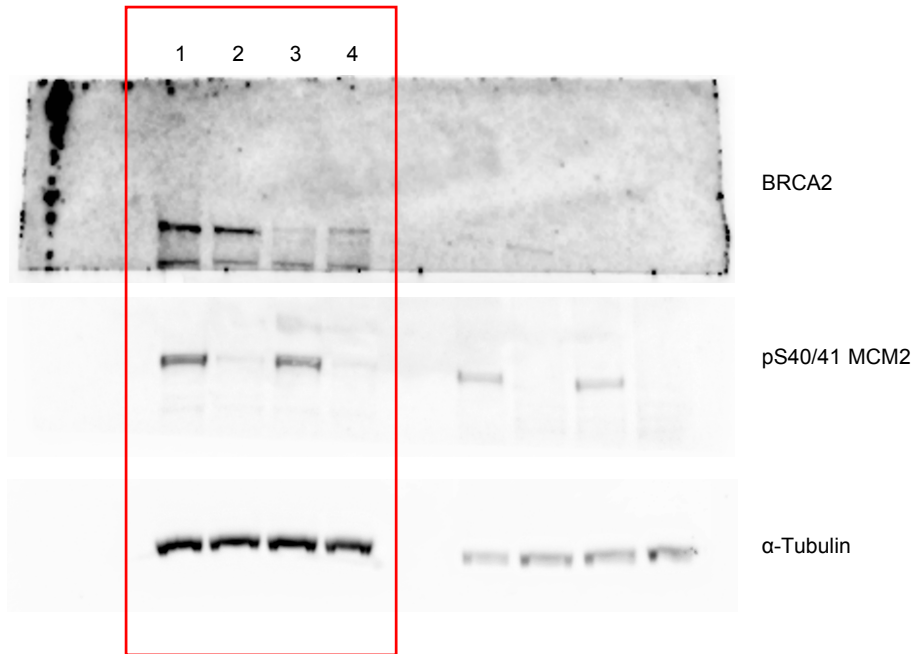

**Figure 5C source data**

IdU/CldU tract length ratio\_U2OS cells (Fork degradation)

|    | siLuc     | siLuc<br>XL413 | siBRCA2   | siBRCA2<br>XL413 |
|----|-----------|----------------|-----------|------------------|
| 1  | 0.9397261 | 0.8350306      | 0.5848485 | 0.8980582        |
| 2  | 0.9581152 | 0.90625        | 0.6188437 | 1.108824         |
| 3  | 1.135734  | 0.9440389      | 0.7968254 | 1.078212         |
| 4  | 1.142529  | 0.5939086      | 0.9291667 | 1.327314         |
| 5  | 0.9260355 |                | 0.7268409 | 0.957359         |
| 6  | 1.184713  | 0.684058       | 0.9417475 | 1.027027         |
| 7  | 1.051414  | 0.9455253      | 0.6578947 | 0.6305085        |
| 8  | 0.7411168 | 1.478814       | 0.4561403 | 0.8461539        |
| 9  | 1.124514  | 0.9333333      | 0.6405229 | 0.9190938        |
| 10 | 0.8130435 | 0.5533597      | 0.7890625 | 0.8014184        |
| 11 | 1.142857  | 1.016529       | 0.8046875 | 0.7107143        |
| 12 | 0.9407666 | 0.8242424      | 1.012121  | 1.276423         |
| 13 | 0.8809524 | 0.8396226      | 1.13486   | 1.234501         |
| 14 | 1.111111  | 0.6890756      | 1.016598  | 1.417795         |
| 15 | 1.1       | 0.8049645      | 0.8233083 | 1.01087          |
| 16 | 0.7027027 | 0.9946808      | 0.9320755 | 1.304825         |
| 17 | 0.832967  |                | 0.4753521 | 1.306962         |
| 18 | 0.8813131 | 0.9478827      | 0.5701358 | 1.024793         |
| 19 | 0.8495822 | 0.9846154      | 0.7476038 | 1.069588         |
| 20 | 0.9699399 | 0.8732395      | 0.8083067 | 0.8844086        |
| 21 | 0.9742268 | 0.9530387      | 0.7172012 | 1.062112         |
| 22 | 0.8137931 | 1.10303        | 1.157895  | 1.167043         |
| 23 | 1.190323  | 0.9833333      | 0.6650831 | 1.27686          |
| 24 | 1.09375   | 1.037037       | 0.4844961 | 1.023077         |
| 25 | 0.9164345 | 1.052632       | 0.6875    | 0.6449865        |
| 26 | 0.8984375 | 1.323843       | 0.5748503 | 0.8333333        |
| 27 | 0.8362069 | 0.7239819      | 0.5820106 | 0.6627566        |
| 28 | 0.931677  | 0.9848101      | 0.6124567 | 0.6887417        |
| 29 | 1.421622  | 1.116751       | 0.7663817 | 0.8293413        |
| 30 | 0.7814815 | 0.8111888      | 0.85918   | 1.01             |
| 31 | 1.368644  | 1.032323       | 0.794686  | 0.8566775        |
| 32 | 1.04607   | 0.8677494      | 0.739785  | 0.7749287        |
| 33 | 1.204778  | 1.349333       | 0.7982709 | 0.8208955        |
| 34 | 1.105983  | 0.8401015      | 0.8316151 | 1.069498         |
| 35 | 1.323782  | 0.7656676      | 0.7224265 | 0.9752475        |
| 36 | 0.9302832 | 1.241935       | 0.7089109 | 1.140496         |
| 37 | 1.018767  | 1.026906       | 0.5022124 | 0.908642         |
| 38 | 0.9972299 | 0.9392097      | 1.097484  | 1.052506         |
| 39 | 1.402948  | 0.8721228      | 0.764881  | 0.9121495        |
| 40 | 1.114973  | 0.6700507      | 0.38921   | 0.3970588        |

|    |           |           |           |           |
|----|-----------|-----------|-----------|-----------|
| 41 | 0.9324675 | 0.6738545 | 0.7473684 | 1.125698  |
| 42 | 0.99729   | 0.8521127 | 0.625     | 0.6576577 |
| 43 | 0.6740332 | 1.241611  | 0.7433962 | 0.8666667 |
| 44 | 1.05638   | 0.9093851 | 0.8285714 | 1.025316  |
| 45 | 0.9239544 | 1.059524  | 0.584375  | 0.9918033 |
| 46 | 1.018391  | 0.9846547 | 0.6614907 | 1.13164   |
| 47 | 0.9600798 | 0.7582418 | 0.6864111 | 0.9156977 |
| 48 | 0.9141274 | 1         | 0.8229814 | 1.221925  |
| 49 | 1.309091  | 0.6756098 | 0.6059783 | 0.9681697 |
| 50 | 0.9001849 | 1.214477  | 0.7753087 | 1.031884  |
| 51 | 1.125257  | 1.166667  | 0.6688524 | 0.7902098 |
| 52 | 1.046154  | 0.8845361 | 0.7624633 | 1.00885   |
| 53 | 1.19697   | 1.20274   | 0.5205811 | 1.125     |
| 54 | 0.8903654 | 0.7682243 | 0.7727273 | 1.045714  |
| 55 | 0.9       | 1.42492   | 0.6654136 | 1.032738  |
| 56 | 1.100946  | 1.176471  | 0.705298  | 0.8401254 |
| 57 | 0.7168368 | 1.123377  | 0.5812183 | 1.173729  |
| 58 | 0.9371428 | 1.338673  | 0.5379538 | 0.99      |
| 59 | 0.9701195 | 1.0525    | 0.6413374 | 1.093842  |
| 60 | 0.9055118 | 1.4125    | 0.9699571 | 1.487261  |
| 61 | 0.9674621 | 0.8860294 | 0.7511961 | 0.8760504 |
| 62 | 0.6117936 | 1.060606  | 0.4798206 | 0.7032258 |
| 63 | 0.9477807 | 1.068452  | 0.6596639 | 1.029674  |
| 64 | 0.9240506 | 1.225564  | 0.4832215 | 0.8228228 |
| 65 | 1.036675  | 0.9342629 | 0.9372694 | 1.208589  |
| 66 | 1.039216  | 0.79375   | 1         | 0.9577115 |
| 67 | 1.140805  | 0.9637462 | 0.6280992 | 0.9061785 |
| 68 | 0.9558011 | 0.7946429 | 0.5824468 | 1.095652  |
| 69 | 0.9444444 | 0.5877438 | 0.5934066 | 0.9527273 |
| 70 | 0.9876923 | 0.9067524 | 0.6433824 | 0.8236715 |
| 71 | 1.074919  | 0.990566  | 0.6227106 | 0.6566416 |
| 72 | 0.8174157 | 1.027601  | 0.900277  | 1.074713  |
| 73 | 0.8434164 | 1.141868  | 0.9575163 | 0.9252077 |
| 74 | 1.148936  | 0.8868613 | 0.6656716 | 1.129794  |
| 75 | 0.9364706 | 0.8893617 | 0.7304965 | 0.9141791 |
| 76 | 0.8577586 | 0.9579832 | 0.5555556 | 1.134658  |
| 77 | 0.8681462 | 0.8899676 | 0.5932204 | 1.156118  |
| 78 | 1.207477  | 0.9458333 | 0.5833333 | 1.123116  |
| 79 | 1.063686  | 1.336032  | 0.7696202 | 1.11499   |
| 80 | 1.106013  | 0.9169329 | 0.9328859 | 1.057143  |
| 81 | 0.960961  | 1.071225  | 0.9271255 | 1.027397  |
| 82 | 1.313629  | 1.007905  | 0.3992095 | 1.367133  |
| 83 | 1.041276  | 0.9196429 | 1.011407  | 1.293333  |
| 84 | 1.089015  | 1.014842  | 0.8717949 | 0.9644381 |

|     |           |           |           |           |
|-----|-----------|-----------|-----------|-----------|
| 85  | 1.343802  | 0.7394958 | 0.6832918 | 1.070588  |
| 86  | 1.339683  | 1.138264  | 0.7205882 | 1.175589  |
| 87  | 1.068293  | 0.8665105 | 0.9339623 | 1.083183  |
| 88  | 0.5547619 | 0.908805  | 0.8164893 | 1.022684  |
| 89  | 1.04955   | 1.170051  | 0.5735294 | 0.7743363 |
| 90  | 0.8872017 | 0.9935898 | 1.01847   | 1.389058  |
| 91  | 0.8194444 | 1.372671  | 0.5409357 | 1.095064  |
| 92  | 1.186567  | 0.9020619 | 0.6835443 | 1.10177   |
| 93  | 1.004688  | 1.119403  | 1.023529  | 1.165079  |
| 94  | 1.030445  | 1.30597   | 0.5818182 | 1.237237  |
| 95  | 1.076923  | 1.171717  | 0.6464646 | 1.044543  |
| 96  | 0.9058824 | 1.278431  | 0.5582822 | 0.5840909 |
| 97  | 1.237245  | 1.070288  | 0.7444444 | 0.8046595 |
| 98  | 0.8555241 | 1.153846  | 0.7584098 | 1.359036  |
| 99  | 1.096591  | 0.9976304 | 0.7692308 | 1.065217  |
| 100 | 0.619171  | 1.26009   | 0.6829787 | 0.7602041 |
| 101 | 1.035336  | 0.8648649 | 0.6785714 | 1.092084  |
| 102 | 1.031646  | 1.086207  | 1.019608  | 0.7925445 |
| 103 | 1.065892  | 1.054744  | 0.9770408 | 1.189796  |
| 104 | 1.049816  | 1.017301  | 0.6643836 | 1.017544  |
| 105 | 1.064655  | 1.316804  | 0.7491166 | 1.023411  |
| 106 | 0.8251748 | 1.051195  | 0.5643836 | 1.088     |
| 107 | 1.062157  | 1.107817  | 0.7329193 | 1.105691  |
| 108 | 1.268949  | 0.8764846 | 0.6325582 | 0.8361702 |
| 109 | 1.210736  | 0.8535211 | 0.5183946 | 1.001758  |
| 110 | 1.142857  | 1.03563   | 0.9154078 | 0.9508671 |
| 111 | 0.9631902 | 1.20911   | 1.057508  | 0.887689  |
| 112 | 1.180157  | 1.244804  | 0.9046053 | 0.9709544 |
| 113 | 1.162095  | 1.101626  | 1.080925  | 0.947541  |
| 114 | 1.226829  | 1.240088  | 0.6580882 | 1.013889  |
| 115 | 1.336043  | 0.8903654 | 0.8486842 | 0.8025135 |
| 116 | 1.447761  | 1.404348  | 0.8418079 | 0.4428969 |
| 117 | 0.6930233 | 0.9962049 | 0.8349282 | 0.9452736 |
| 118 | 1.224382  |           | 0.7096774 | 0.9702233 |
| 119 | 1.03352   | 1.51579   | 0.6895425 | 0.47981   |
| 120 | 1.057416  | 0.9543011 | 0.7923977 | 0.6198502 |
| 121 | 1.160287  | 0.9815436 | 0.6056338 | 0.8568421 |
| 122 | 0.9257504 | 1.260309  | 0.6769663 | 1.045894  |
| 123 | 1.007557  | 0.8770492 | 1.070313  | 0.8844086 |
| 124 | 1.089404  | 1.192946  | 0.7344633 | 0.8568376 |
| 125 | 0.9801527 |           | 0.7872341 | 0.7175792 |
| 126 | 1.132936  |           | 1.05802   | 0.8834952 |
| 127 | 1.034121  |           | 0.829932  | 1         |
| 128 | 1.390716  |           | 1.059748  |           |

|             |             |             |             |             |
|-------------|-------------|-------------|-------------|-------------|
| 129         | 0.9701231   |             | 0.7967914   |             |
| 130         | 1.079625    |             | 0.946502    |             |
| 131         |             |             | 0.9669967   |             |
| 132         |             |             | 0.7340425   |             |
| 133         |             |             | 0.472028    |             |
| 134         |             |             | 0.8160535   |             |
| 135         |             |             | 0.480663    |             |
| 136         |             |             | 0.5471204   |             |
| 137         |             |             | 0.8054608   |             |
| 138         |             |             | 0.5390244   |             |
| 139         |             |             | 0.5635179   |             |
| 140         |             |             | 0.4115756   |             |
| 141         |             |             | 0.5735294   |             |
| 142         |             |             | 0.890785    |             |
| <b>Mean</b> | <b>1.02</b> | <b>1.01</b> | <b>0.74</b> | <b>0.98</b> |

### Figure 5D source data

Mean values of IdU/CldU tract length ratio\_U2OS cells (Fork degradation - 3 independent experiments)

| Experiment | siLuc | siLuc<br>XL413 | siBRCA2 | siBRCA2<br>XL413 |
|------------|-------|----------------|---------|------------------|
| 1          | 0.994 | 1.004          | 0.791   | 0.916            |
| 2          | 0.975 | 1.140          | 0.737   | 0.905            |
| 3          | 1.024 | 1.010          | 0.740   | 0.984            |

### Figure 5F source data

Percentage of reversed forks\_U2OS cells

| siLuc<br>(78) | siLuc<br>XL413<br>(92) | siBRCA2<br>(72) | siBRCA2<br>XL413<br>(74) |
|---------------|------------------------|-----------------|--------------------------|
| 23            | 23                     | 12              | 22                       |

Parenthesis indicates the number of reversed forks counted

**Figure 5G source data**

Length of ssDNA (nucleotides) at junctions

|             | siLuc<br>HU   | siLuc<br>HU + XL413 | siBRCA2<br>HU | siBRCA2<br>HU + XL413 |
|-------------|---------------|---------------------|---------------|-----------------------|
| 1           | 131.1         | 50.6                | 43.7          | 326.6                 |
| 2           | 154.1         | 223.1               | 253           | 200.1                 |
| 3           | 85.1          | 163.3               | 207           | 142.6                 |
| 4           | 52.9          | 80.5                | 138           | 96.6                  |
| 5           | 126.5         | 59.8                | 55.2          | 135.7                 |
| 6           | 66.7          | 133.4               | 220.8         | 73.6                  |
| 7           | 64.4          | 80.5                | 195.5         | 230                   |
| 8           | 239.2         | 73.6                | 110.4         | 144.9                 |
| 9           | 140.3         | 328.9               | 340.4         | 101.2                 |
| 10          | 46            | 225.4               | 89.7          | 138                   |
| 11          | 324.3         | 184                 | 308.2         | 96.6                  |
| 12          | 46            | 144.9               | 342.7         | 87.4                  |
| 13          | 147.2         | 78.2                | 264.5         | 110.4                 |
| 14          | 52.9          | 96.6                | 55.2          | 140.3                 |
| 15          | 161           | 69                  | 165.6         | 142.6                 |
| 16          | 133.4         | 34.5                | 117.3         | 48.3                  |
| 17          | 64.4          | 243.8               | 142.6         | 301.3                 |
| 18          | 1108.6        | 101.2               | 234.6         | 94.3                  |
| 19          | 71.3          | 59.8                | 299           | 179.4                 |
| 20          | 167.9         | 48.3                | 165.6         | 154.1                 |
| 21          | 52.9          | 94.3                | 225.4         | 133.4                 |
| 22          | 133.4         | 52.9                | 69            | 112.7                 |
| 23          | 57.5          | 59.8                | 96.6          | 342.7                 |
| 24          | 133.4         | 809.6               | 89.7          | 78.2                  |
| 25          | 177.1         | 48.3                | 575           | 135.7                 |
| 26          | 372.6         | 170.2               | 248.4         | 124.2                 |
| 27          | 112.7         | 128.8               | 524.4         | 78.2                  |
| 28          | 50.6          | 165.6               | 522.1         | 416.3                 |
| 29          | 80.5          | 156.4               | 128.8         | 103.5                 |
| 30          | 259.9         | 85.1                | 138           | 220.8                 |
| 31          | 59.8          |                     | 400.2         | 78.2                  |
| 32          |               |                     | 241.5         | 246.1                 |
| 33          |               |                     | 144.9         |                       |
| 34          |               |                     | 184           |                       |
| 35          |               |                     | 133.4         |                       |
| 36          |               |                     | 264.5         |                       |
| 37          |               |                     | 135.7         |                       |
| 38          |               |                     | 292.1         |                       |
| <b>Mean</b> | <b>157.22</b> | <b>141.68</b>       | <b>214.81</b> | <b>156.69</b>         |
