# Supplementary material for: CDC7 kinase promotes MRE11 fork processing, modulating fork speed and chromosomal breakage
Source: PubMed Central journal article supplement — EMBO Rep. 2020 Jun 4;21(8):e48920. doi: 10.15252/embr.201948920 (PMC7403700; doi:10.15252/embr.201948920), 2020-06-04
Supplement: EMBR-21-e48920-s008.pdf [file EMBR-21-e48920-s008.pdf]

**Figure 6B source data**

Number of chromatid breaks per spread\_U2OS cells (XL413 + HU)

| Experiment | siCon<br>Untreated | siCon<br>HU | siCon<br>HU + XL413 | siBRCA2<br>Untreated | siBRCA2<br>HU | siBRCA2<br>HU + XL413 |
|------------|--------------------|-------------|---------------------|----------------------|---------------|-----------------------|
| 1          | 0.2                | 1.2         | 0.4                 | 0.6                  | 2             | 0.5                   |
| 2          | 0.33               | 1.7         | 0.6                 | 1.87                 | 2.6           | 1.37                  |
| 3          | 0.12               | 1.44        | 0.3                 | 1.44                 | 2.56          | 0.82                  |

**Figure 6C source data**

Number of chromatid breaks per spread\_ MCF10A-AS cells (3MB-PP1 + HU)

| Experiment | siCon<br>Untreated | siCon<br>HU | siCon<br>HU + 3MB-PP1 | siBRCA2<br>Untreated | siBRCA2<br>HU | siBRCA2<br>HU + 3MB-PP1 |
|------------|--------------------|-------------|-----------------------|----------------------|---------------|-------------------------|
| 1          | 0.3                | 2.03        | 0.93                  | 1.8                  | 2.73          | 1                       |
| 2          | 0.4                | 1.5         | 0.8                   | 1.4                  | 2.7           | 0.6                     |
| 3          | 0.29               | 2.02        | 1                     | 1.33                 | 2.62          | 1.19                    |

**Figure 6D source data**

Number of chromatid breaks per spread\_U2OS cells (XL413 alone)

| Experiment | siCon Untreated | siCon XL413 | siBRCA2 Untreated | siBRCA2 XL413 |
|------------|-----------------|-------------|-------------------|---------------|
| 1          | 0.04            | 0.2         | 1.7               | 0.5           |
| 2          | 0.07            | 0.23        | 1.63              | 0.3           |
| 3          | 0.07            | 0.17        | 1.6               | 0.7           |

**Figure 6E source data**

Number of chromatid breaks per spread\_MCF10A-AS cells (3MB-PP1 alone)

| Experiment | siCon Untreated | siCon 3MB-PP1 | siBRCA2 Untreated | siBRCA2 3MB-PP1 |
|------------|-----------------|---------------|-------------------|-----------------|
| 1          | 0.1             | 0.1           | 0.73              | 0.13            |
| 2          | 0.07            | 0.07          | 0.4               | 0.17            |
| 3          | 0.1             | 0.03          | 1                 | 0.28            |
